# Supplementary material for: Waste Around Longhouses: Taphonomy on LBK Settlement in Hlízov
Source: publisher site journal article supplement (doi:10.1515/opar-2024-0032), 2025-01-01
Supplement: Supplementary file 1 [file SUPL1_Pottery_databese.xlsx]

## Sheet: Vessels
Site	Feature	ID_vessel	N_shreds	Fine_Coarse	Decor_type	Knob	Handle	Technical decoration	LOPOIII	LO_emic	edge_type	line_width	line_profile	rim_diameter
Hlízov	1	10010	2	f	NO	-	-	-	-	-	-	-	-	-
Hlízov	1	10020	2	c	NO	-	-	-	-	-	-	-	-	-
Hlízov	3	30010	3	f	LO	-	-	-	311	DELTA10	5	5	v	-
Hlízov	3	30020	2	f	LO	-	-	-	311	DELTA10	-	16	v	-
Hlízov	3	30030	1	f	LO	-	-	-	311	DELTA10	-	9	u	-
Hlízov	3	30040	4	f	NO	-	-	-	-	-	-	-	-	-
Hlízov	3	30060	1	c	NO	-	-	-	-	-	-	-	-	-
Hlízov	3	30070	1	f	NO	-	-	-	-	-	-	-	-	-
Hlízov	3	30080	2	c	NO	-	-	-	-	-	-	-	-	-
Hlízov	3	30090	1	c	NO	-	-	-	-	-	-	-	-	-
Hlízov	4	40030	1	f	NO	-	-	-	-	-	-	-	-	-
Hlízov	5	50010	1	f	NO	-	-	-	310	DELTA10	-	-	-	-
Hlízov	6	60010	1	f	NO	-	-	-	-	-	-	-	-	-
Hlízov	6	60020	1	f	NO	-	-	-	-	-	-	-	-	-
Hlízov	7	70010	1	f	NO	-	-	-	-	-	-	-	-	-
Hlízov	7	70020	1	f	NO	-	-	-	-	-	-	-	-	-
Hlízov	7	70030	1	f	NO	-	-	-	-	-	-	-	-	-
Hlízov	8	80010	1	f	NO	-	-	-	-	-	-	-	-	-
Hlízov	9	90010	11	F	LO	-	-	-	310	DELTA10	-	22	v	-
Hlízov	9	90020	3	f	LO	-	-	-	310	DELTA10	-	19	v	-
Hlízov	9	90030	1	f	LO	-	-	-	310	DELTA10	1	10	v	14
Hlízov	9	90040	7	f	LO	-	-	-	310	DELTA10	2	21	u	14
Hlízov	9	90050	1	f	LO	-	-	-	310	DELTA10	-	10	v	-
Hlízov	9	90060	1	f	LO	-	-	-	310	DELTA10	-	14	u	-
Hlízov	9	90070	2	f	LO	-	-	-	310	DELTA10	-	10	v	-
Hlízov	9	90080	1	f	LO	-	-	-	310	DELTA10	-	20	u	-
Hlízov	9	90090	1	f	LO	-	-	-	310	DELTA10	-	18	u	-
Hlízov	9	90100	2	f	LO	-	-	-	310	DELTA10	-	13	u	-
Hlízov	9	90110	1	f	LO	-	-	-	310	DELTA10	-	13	v	-
Hlízov	9	90130	1	f	LO	-	-	-	310	DELTA10	-	14	u	-
Hlízov	9	90140	1	f	LO	-	-	-	310	DELTA10	8	21	u	22
Hlízov	9	90150	1	f	LO	-	-	-	310	DELTA10	-	18	u	-
Hlízov	9	90160	1	f	LO	-	-	-	310	DELTA10	-	11	v	-
Hlízov	9	90170	1	f	LO	-	-	-	310	DELTA10	-	15	u	-
Hlízov	9	90190	1	f	LO	-	-	-	310	DELTA10	-	-	-	-
Hlízov	9	90200	1	f	LO	-	-	-	310	DELTA10	-	17	v	-
Hlízov	9	90220	2	f	LO	-	-	-	310	DELTA10	-	-	-	-
Hlízov	9	90230	1	f	LO	-	-	-	310	DELTA10	-	15	v	-
Hlízov	9	90240	1	f	LO	-	-	-	310	DELTA10	-	12	u	-
Hlízov	9	90250	1	f	LO	-	-	-	310	DELTA10	8	6	v	18
Hlízov	9	90260	1	f	LO	-	-	-	310	DELTA10	-	5	v	-
Hlízov	9	90270	1	f	LO	-	-	-	310	DELTA10	-	9	u	-
Hlízov	9	90280	2	f	LO	-	-	-	310	DELTA10	-	-	-	-
Hlízov	9	90290	1	f	LO	-	-	-	310	DELTA10	-	22	u	-
Hlízov	9	90300	1	f	NO	-	-	-	-	-	-	-	-	-
Hlízov	9	90310	1	f	LO	-	-	-	310	DELTA10	-	16	u	-
Hlízov	9	90320	1	f	LO	-	-	-	310	DELTA10	-	14	u	-
Hlízov	9	90330	1	f	LO	-	-	-	310	DELTA10	-	11	u	-
Hlízov	9	90340	1	f	LO	-	-	-	310	DELTA10	-	14	u	-
Hlízov	9	90350	1	f	NO	-	-	-	-	-	-	-	-	-
Hlízov	9	90370	1	f	LO	-	-	-	310	DELTA10	-	11	u	-
Hlízov	9	90380	1	f	NO	-	-	-	-	-	-	-	-	-
Hlízov	9	90390	1	f	LO	-	-	-	310	DELTA10	-	-	-	-
Hlízov	9	90400	1	f	NO	-	-	-	-	-	-	-	-	-
Hlízov	9	90410	1	f	LO	-	-	-	310	DELTA10	-	13	u	-
Hlízov	9	90420	1	f	NO	-	-	-	-	-	-	-	-	-
Hlízov	9	90430	1	f	LO	-	-	-	110	GAMA10	-	22	u	-
Hlízov	9	90440	1	f	LO	-	-	-	310	DELTA10	-	-	-	-
Hlízov	9	90450	1	f	NO	-	-	-	-	-	-	-	-	-
Hlízov	9	90460	1	f	LO	-	-	-	310	DELTA10	-	5	v	-
Hlízov	9	90470	1	f	LO	-	-	-	410	EPSILON10	-	18	v	-
Hlízov	9	90480	1	f	TO	-	-	20	-	-	-	-	-	-
Hlízov	9	90490	12	c	TO	557	-	24	-	-	1	-	-	14
Hlízov	9	90500	1	f	TO	-	-	24	-	-	-	-	-	-
Hlízov	9	90510	19	f	NO	-	-	-	-	-	8	-	-	12
Hlízov	9	90520	1	f	NO	-	-	-	-	-	8	-	-	16
Hlízov	9	90530	1	f	NO	-	-	-	-	-	8	-	-	14
Hlízov	9	90540	1	f	NO	-	-	-	-	-	8	-	-	20
Hlízov	9	90560	1	f	NO	-	-	-	-	-	8	-	-	20
Hlízov	9	90570	5	f	NO	-	-	-	-	-	8	-	-	20
Hlízov	9	90590	1	f	NO	-	-	-	-	-	2	-	-	12
Hlízov	9	90600	1	f	NO	-	-	-	-	-	2	-	-	15
Hlízov	9	90630	1	f	NO	-	-	-	-	-	8	-	-	10
Hlízov	9	90640	1	f	NO	-	-	-	-	-	2	-	-	12
Hlízov	9	90650	1	f	NO	-	-	-	-	-	8	-	-	18
Hlízov	9	90660	6	c	NO	-	-	-	-	-	2	-	-	24
Hlízov	9	90670	1	c	NO	223	-	-	-	-	5	-	-	22
Hlízov	9	90680	19	c	NO	113, 556	-	-	-	-	9	-	-	34
Hlízov	9	90690	3	c	NO	-	-	-	-	-	-	-	-	-
Hlízov	9	90700	3	c	NO	-	-	-	-	-	-	-	-	-
Hlízov	9	90710	1	c	NO	-	-	-	-	-	-	-	-	-
Hlízov	9	90730	1	f	NO	-	-	-	-	-	-	-	-	-
Hlízov	9	90740	1	c	NO	-	-	-	-	-	-	-	-	-
Hlízov	9	90750	6	c	NO	-	-	-	-	-	-	-	-	-
Hlízov	9	90760	1	c	NO	-	-	-	-	-	-	-	-	-
Hlízov	9	90770	1	c	NO	-	-	-	-	-	-	-	-	-
Hlízov	9	90780	1	c	NO	-	-	-	-	-	-	-	-	-
Hlízov	9	90800	5	c	NO	-	20	-	-	-	-	-	-	-
Hlízov	9	90810	1	c	NO	-	20	-	-	-	-	-	-	-
Hlízov	9	90820	1	c	NO	-	20	-	-	-	-	-	-	-
Hlízov	9	90830	1	c	NO	224	-	-	-	-	-	-	-	-
Hlízov	9	90840	1	c	NO	-	-	-	-	-	-	-	-	-
Hlízov	9	90850	1	c	NO	-	-	-	-	-	-	-	-	-
Hlízov	9	90860	1	c	NO	556	-	-	-	-	-	-	-	-
Hlízov	9	90870	1	f	NO	556	-	-	-	-	-	-	-	-
Hlízov	9	90880	1	c	NO	711	-	-	-	-	-	-	-	-
Hlízov	9	90890	3	c	NO	570	-	-	-	-	-	-	-	-
Hlízov	9	90900	1	c	TO	-	-	1	-	-	-	-	-	-
Hlízov	9	90910	1	C	NO	-	-	-	-	-	-	-	-	-
Hlízov	9	90920	3	F	NO	-	-	-	-	-	-	-	-	-
Hlízov	9	90940	9	F	NO	-	-	-	-	-	-	-	-	-
Hlízov	9	90950	7	F	NO	-	-	-	-	-	-	-	-	-
Hlízov	9	90960	6	F	LO	-	-	-	311	DELTA10	-	12	u	-
Hlízov	9	90970	10	f	NO	-	-	-	-	-	5	-	-	-
Hlízov	9	90990	10	f	NO	-	-	-	-	-	-	-	-	-
Hlízov	9	91000	1	F	NO	-	-	-	-	-	-	-	-	-
Hlízov	9	91010	1	F	NO	-	-	-	-	-	-	-	-	-
Hlízov	9	91020	1	F	NO	-	-	-	-	-	-	-	-	-
Hlízov	9	91030	2	F	NO	-	-	-	-	-	-	-	-	-
Hlízov	9	91040	2	f	LO	-	-	-	110	GAMA10	-	28	u	-
Hlízov	9	91060	2	F	NO	-	-	-	-	-	-	-	-	-
Hlízov	9	91070	1	F	NO	-	-	-	-	-	-	-	-	-
Hlízov	9	91080	1	F	NO	-	-	-	-	-	-	-	-	-
Hlízov	9	91090	1	C	NO	-	-	-	-	-	-	-	-	-
Hlízov	9	91100	3	f	NO	-	-	-	-	-	-	-	-	-
Hlízov	9	91110	1	F	NO	-	-	-	-	-	-	-	-	-
Hlízov	9	91120	2	F	NO	-	-	-	-	-	-	-	-	-
Hlízov	9	91130	1	F	NO	-	-	-	-	-	-	-	-	-
Hlízov	9	91150	1	F	NO	-	-	-	-	-	-	-	-	-
Hlízov	9	91160	2	F	NO	-	-	-	-	-	-	-	-	-
Hlízov	9	91170	1	F	NO	-	-	-	-	-	-	-	-	-
Hlízov	9	91190	1	F	NO	-	-	-	-	-	-	-	-	-
Hlízov	9	91200	1	F	NO	-	-	-	-	-	-	-	-	-
Hlízov	9	91210	1	F	NO	-	-	-	-	-	-	-	-	-
Hlízov	9	91230	1	C	NO	-	-	-	-	-	-	-	-	-
Hlízov	9	91250	1	C	NO	-	-	-	-	-	-	-	-	-
Hlízov	9	91260	1	C	NO	-	-	-	-	-	-	-	-	-
Hlízov	9	91290	1	F	NO	-	-	-	-	-	-	-	-	-
Hlízov	9	91300	1	F	NO	-	-	-	-	-	-	-	-	-
Hlízov	9	91310	1	C	NO	-	-	-	-	-	-	-	-	-
Hlízov	9	91320	1	C	NO	-	-	-	-	-	-	-	-	-
Hlízov	9	91330	1	F	NO	-	-	-	-	-	-	-	-	-
Hlízov	9	91360	7	F	NO	-	-	-	-	-	-	-	-	-
Hlízov	9	91370	1	C	NO	-	-	-	-	-	-	-	-	-
Hlízov	9	91410	1	C	NO	-	-	-	-	-	-	-	-	-
Hlízov	9	91420	4	C	NO	-	-	-	-	-	-	-	-	-
Hlízov	9	91430	4	f	NO	-	-	-	-	-	-	-	-	-
Hlízov	9	91440	1	C	NO	-	-	-	-	-	-	-	-	-
Hlízov	9	91450	4	f	NO	-	-	-	-	-	-	-	-	-
Hlízov	9	91460	2	C	NO	-	-	-	-	-	-	-	-	-
Hlízov	9	91470	3	f	NO	-	-	-	-	-	-	-	-	-
Hlízov	9	91490	1	F	NO	-	-	-	-	-	-	-	-	-
Hlízov	9	91500	1	C	NO	-	-	-	-	-	-	-	-	-
Hlízov	9	91510	2	F	NO	-	-	-	-	-	-	-	-	-
Hlízov	9	91520	3	c	NO	-	-	-	-	-	-	-	-	-
Hlízov	9	91530	2	c	NO	-	-	-	-	-	-	-	-	-
Hlízov	9	91550	1	c	NO	-	-	-	-	-	-	-	-	-
Hlízov	9	91560	1	c	NO	-	-	-	-	-	-	-	-	-
Hlízov	9	91570	1	C	NO	-	-	-	-	-	-	-	-	-
Hlízov	9	91580	10	c	NO	-	-	-	-	-	-	-	-	-
Hlízov	9	91590	8	c	NO	-	-	-	-	-	-	-	-	-
Hlízov	9	91600	1	c	NO	-	-	-	-	-	-	-	-	-
Hlízov	9	91610	4	c	NO	-	-	-	-	-	-	-	-	-
Hlízov	9	91620	9	c	NO	-	-	-	-	-	-	-	-	-
Hlízov	9	91630	1	c	NO	-	-	-	-	-	-	-	-	-
Hlízov	9	91640	1	c	NO	-	-	-	-	-	-	-	-	-
Hlízov	9	91650	1	c	NO	-	-	-	-	-	-	-	-	-
Hlízov	9	91660	1	c	NO	-	-	-	-	-	-	-	-	-
Hlízov	9	91680	1	c	NO	-	-	-	-	-	-	-	-	-
Hlízov	9	91700	2	c	NO	-	-	-	-	-	-	-	-	-
Hlízov	9	91720	1	c	NO	-	-	-	-	-	-	-	-	-
Hlízov	9	91730	3	c	NO	-	-	-	-	-	-	-	-	-
Hlízov	9	91740	2	c	NO	-	-	-	-	-	-	-	-	-
Hlízov	9	91750	2	c	NO	-	-	-	-	-	-	-	-	-
Hlízov	9	91760	2	c	NO	-	-	-	-	-	-	-	-	-
Hlízov	9	91770	22	c	NO	-	-	-	-	-	-	-	-	-
Hlízov	9	91780	12	c	NO	-	-	-	-	-	-	-	-	-
Hlízov	9	91800	1	c	NO	-	-	-	-	-	-	-	-	-
Hlízov	9	91810	1	c	NO	-	-	-	-	-	-	-	-	-
Hlízov	9	91820	1	c	NO	-	-	-	-	-	-	-	-	-
Hlízov	9	91830	1	c	NO	-	-	-	-	-	-	-	-	-
Hlízov	9	91840	1	c	NO	-	-	-	-	-	-	-	-	-
Hlízov	9	91850	1	c	NO	-	-	-	-	-	-	-	-	-
Hlízov	9	91860	1	c	NO	-	-	-	-	-	-	-	-	-
Hlízov	9	91870	1	c	NO	-	-	-	-	-	-	-	-	-
Hlízov	9	91880	1	c	NO	-	-	-	-	-	-	-	-	-
Hlízov	9	91890	1	c	NO	-	-	-	-	-	-	-	-	-
Hlízov	9	91900	1	c	NO	-	-	-	-	-	-	-	-	-
Hlízov	9	91910	1	c	NO	-	-	-	-	-	-	-	-	-
Hlízov	9	91920	1	c	NO	-	-	-	-	-	-	-	-	-
Hlízov	9	91930	1	c	NO	-	-	-	-	-	-	-	-	-
Hlízov	9	91940	1	c	NO	-	-	-	-	-	-	-	-	-
Hlízov	9	91950	1	c	NO	-	-	-	-	-	-	-	-	-
Hlízov	9	91960	2	c	NO	-	-	-	-	-	-	-	-	-
Hlízov	9	91970	1	c	NO	-	-	-	-	-	-	-	-	-
Hlízov	9	91980	1	c	NO	-	-	-	-	-	-	-	-	-
Hlízov	9	91990	1	c	NO	-	-	-	-	-	-	-	-	-
Hlízov	9	92000	1	c	NO	-	-	-	-	-	-	-	-	-
Hlízov	9	92010	1	c	NO	-	-	-	-	-	-	-	-	-
Hlízov	9	92020	1	c	NO	-	-	-	-	-	-	-	-	-
Hlízov	9	92030	1	c	NO	-	-	-	-	-	-	-	-	-
Hlízov	9	92040	1	c	NO	-	-	-	-	-	-	-	-	-
Hlízov	9	92050	1	c	NO	-	-	-	-	-	-	-	-	-
Hlízov	9	92060	1	c	NO	-	-	-	-	-	-	-	-	-
Hlízov	9	92070	1	c	NO	-	-	-	-	-	-	-	-	-
Hlízov	9	92080	1	c	NO	-	-	-	-	-	-	-	-	-
Hlízov	9	92090	1	c	NO	-	-	-	-	-	-	-	-	-
Hlízov	9	92100	1	c	NO	-	-	-	-	-	-	-	-	-
Hlízov	9	92110	1	c	NO	-	-	-	-	-	-	-	-	-
Hlízov	9	92120	1	c	NO	-	-	-	-	-	-	-	-	-
Hlízov	9	92130	1	c	NO	-	-	-	-	-	-	-	-	-
Hlízov	9	92140	1	c	NO	-	-	-	-	-	-	-	-	-
Hlízov	9	92150	1	c	NO	-	-	-	-	-	-	-	-	-
Hlízov	9	92160	1	c	NO	-	-	-	-	-	-	-	-	-
Hlízov	9	92170	1	f	NO	-	-	-	-	-	-	-	-	-
Hlízov	9	92180	1	f	NO	-	-	-	-	-	-	-	-	-
Hlízov	9	92190	1	f	NO	-	-	-	-	-	-	-	-	-
Hlízov	9	92200	1	f	NO	-	-	-	-	-	-	-	-	-
Hlízov	9	92210	1	f	NO	-	-	-	-	-	-	-	-	-
Hlízov	9	92220	1	f	NO	-	-	-	-	-	-	-	-	-
Hlízov	9	92230	1	f	NO	-	-	-	-	-	-	-	-	-
Hlízov	9	92240	1	f	NO	-	-	-	-	-	-	-	-	-
Hlízov	9	92250	1	f	NO	-	-	-	-	-	-	-	-	-
Hlízov	9	92260	1	f	NO	-	-	-	-	-	-	-	-	-
Hlízov	9	92270	1	f	NO	-	-	-	-	-	-	-	-	-
Hlízov	9	92280	1	f	NO	-	-	-	-	-	-	-	-	-
Hlízov	9	92290	1	f	NO	-	-	-	-	-	-	-	-	-
Hlízov	9	92300	1	f	NO	-	-	-	-	-	-	-	-	-
Hlízov	9	92310	1	f	NO	-	-	-	-	-	-	-	-	-
Hlízov	9	92320	1	f	NO	-	-	-	-	-	-	-	-	-
Hlízov	9	92330	1	f	NO	-	-	-	-	-	-	-	-	-
Hlízov	9	92340	1	f	NO	-	-	-	-	-	-	-	-	-
Hlízov	9	92350	1	f	NO	-	-	-	-	-	-	-	-	-
Hlízov	9	92360	1	f	NO	-	-	-	-	-	-	-	-	-
Hlízov	9	92370	1	f	NO	-	-	-	-	-	-	-	-	-
Hlízov	9	92380	1	f	NO	-	-	-	-	-	-	-	-	-
Hlízov	9	92390	1	f	NO	-	-	-	-	-	-	-	-	-
Hlízov	9	92400	1	f	NO	-	-	-	-	-	-	-	-	-
Hlízov	9	92410	1	f	NO	-	-	-	-	-	-	-	-	-
Hlízov	9	92420	1	f	NO	-	-	-	-	-	-	-	-	-
Hlízov	9	92430	1	f	NO	-	-	-	-	-	-	-	-	-
Hlízov	9	92440	1	f	NO	-	-	-	-	-	-	-	-	-
Hlízov	9	92450	1	f	NO	-	-	-	-	-	-	-	-	-
Hlízov	9	92460	1	f	NO	-	-	-	-	-	-	-	-	-
Hlízov	9	92470	1	f	NO	-	-	-	-	-	-	-	-	-
Hlízov	9	92480	1	f	NO	-	-	-	-	-	-	-	-	-
Hlízov	9	92490	1	f	NO	-	-	-	-	-	-	-	-	-
Hlízov	9	92500	1	f	NO	-	-	-	-	-	-	-	-	-
Hlízov	9	92510	1	f	NO	-	-	-	-	-	-	-	-	-
Hlízov	9	92520	1	f	NO	-	-	-	-	-	-	-	-	-
Hlízov	9	92530	1	f	NO	-	-	-	-	-	-	-	-	-
Hlízov	9	92540	1	f	NO	-	-	-	-	-	-	-	-	-
Hlízov	9	92550	1	f	NO	-	-	-	-	-	-	-	-	-
Hlízov	9	92560	1	f	NO	-	-	-	-	-	-	-	-	-
Hlízov	9	92570	1	f	NO	-	-	-	-	-	-	-	-	-
Hlízov	9	92580	1	f	NO	-	-	-	-	-	-	-	-	-
Hlízov	9	92590	1	f	NO	-	-	-	-	-	-	-	-	-
Hlízov	9	92600	1	f	NO	-	-	-	-	-	-	-	-	-
Hlízov	9	92610	1	f	NO	-	-	-	-	-	-	-	-	-
Hlízov	9	92620	1	f	NO	-	-	-	-	-	-	-	-	-
Hlízov	9	92630	1	f	NO	-	-	-	-	-	-	-	-	-
Hlízov	9	92640	1	f	NO	-	-	-	-	-	-	-	-	-
Hlízov	9	92650	1	f	NO	-	-	-	-	-	-	-	-	-
Hlízov	9	92660	1	f	NO	-	-	-	-	-	-	-	-	-
Hlízov	9	92670	1	c	NO	-	-	-	-	-	-	-	-	-
Hlízov	9	92680	1	c	NO	-	-	-	-	-	-	-	-	-
Hlízov	9	92690	1	c	NO	-	-	-	-	-	-	-	-	-
Hlízov	9	92700	1	c	NO	-	-	-	-	-	-	-	-	-
Hlízov	9	92710	1	f	NO	-	-	-	-	-	-	-	-	-
Hlízov	9	92720	1	f	NO	-	-	-	-	-	-	-	-	-
Hlízov	9	92730	1	f	NO	-	-	-	-	-	-	-	-	-
Hlízov	9	92740	1	f	NO	-	-	-	-	-	-	-	-	-
Hlízov	9	92750	1	f	NO	-	-	-	-	-	-	-	-	-
Hlízov	9	92760	1	f	NO	-	-	-	-	-	-	-	-	-
Hlízov	9	92770	1	f	NO	-	-	-	-	-	-	-	-	-
Hlízov	9	92780	1	f	NO	-	-	-	-	-	-	-	-	-
Hlízov	9	92790	1	f	NO	-	-	-	-	-	-	-	-	-
Hlízov	9	92800	1	f	NO	-	-	-	-	-	-	-	-	-
Hlízov	9	92810	1	f	NO	-	-	-	-	-	-	-	-	-
Hlízov	9	92820	1	f	NO	-	-	-	-	-	-	-	-	-
Hlízov	9	92830	1	f	NO	-	-	-	-	-	-	-	-	-
Hlízov	9	92840	1	f	NO	-	-	-	-	-	-	-	-	-
Hlízov	9	92850	1	f	NO	-	-	-	-	-	-	-	-	-
Hlízov	9	92860	1	f	NO	-	-	-	-	-	-	-	-	-
Hlízov	9	92870	1	f	NO	-	-	-	-	-	-	-	-	-
Hlízov	9	92880	1	f	NO	-	-	-	-	-	-	-	-	-
Hlízov	9	92890	1	f	NO	-	-	-	-	-	-	-	-	-
Hlízov	9	92900	1	f	NO	-	-	-	-	-	-	-	-	-
Hlízov	9	92910	1	f	NO	-	-	-	-	-	-	-	-	-
Hlízov	9	92920	1	f	NO	-	-	-	-	-	-	-	-	-
Hlízov	9	92930	1	f	NO	-	-	-	-	-	-	-	-	-
Hlízov	9	92940	1	f	NO	-	-	-	-	-	-	-	-	-
Hlízov	9	92950	1	f	NO	-	-	-	-	-	-	-	-	-
Hlízov	9	92960	1	f	NO	-	-	-	-	-	-	-	-	-
Hlízov	9	92970	1	f	NO	-	-	-	-	-	-	-	-	-
Hlízov	10	100010	4	f	LO	-	-	-	311	DELTA10	-	13	v	-
Hlízov	10	100020	3	f	LO	-	-	-	310	DELTA10	-	14	u	-
Hlízov	10	100040	1	f	LO	-	-	-	311	DELTA10	-	4	v	-
Hlízov	10	100050	2	f	LO	-	-	-	311	DELTA10	-	13	v	-
Hlízov	10	100060	1	c	TO	-	-	24	-	-	-	-	-	-
Hlízov	10	100070	2	c	NO	310	-	-	-	-	-	-	-	-
Hlízov	10	100080	3	f	NO	-	-	-	-	-	5	-	-	16
Hlízov	10	100100	1	f	NO	-	-	-	-	-	8	-	-	27
Hlízov	10	100130	7	f	NO	-	-	-	-	-	-	-	-	-
Hlízov	10	100140	4	f	NO	-	-	-	-	-	-	-	-	-
Hlízov	10	100150	1	f	NO	-	-	-	-	-	-	-	-	-
Hlízov	10	100160	6	f	NO	-	24	-	-	-	-	-	-	-
Hlízov	10	100170	1	c	NO	111	-	-	-	-	-	-	-	-
Hlízov	10	100180	5	c	NO	554	-	-	-	-	-	-	-	-
Hlízov	10	100190	2	c	NO	-	-	-	-	-	-	-	-	-
Hlízov	10	100200	3	f	NO	-	-	-	-	-	-	-	-	-
Hlízov	10	100210	3	f	NO	-	-	-	-	-	-	-	-	-
Hlízov	10	100220	3	f	NO	-	-	-	-	-	8	-	-	-
Hlízov	10	100240	1	f	NO	-	-	-	-	-	-	-	-	-
Hlízov	10	100250	1	f	LO	-	-	-	310	DELTA10	-	8	v	-
Hlízov	10	100260	1	f	LO	-	-	-	310	GAMA10	8	19	u	-
Hlízov	10	100270	1	f	NO	-	-	-	-	-	-	-	-	-
Hlízov	10	100280	1	f	NO	-	-	-	-	-	-	-	-	-
Hlízov	10	100290	1	f	NO	-	-	-	-	-	-	-	-	-
Hlízov	10	100300	1	f	NO	-	-	-	-	-	-	-	-	-
Hlízov	10	100310	2	f	NO	-	-	-	-	-	-	-	-	-
Hlízov	10	100320	1	f	NO	-	-	-	-	-	-	-	-	-
Hlízov	10	100330	1	f	NO	-	-	-	-	-	-	-	-	-
Hlízov	10	100340	3	c	NO	-	-	-	-	-	-	-	-	-
Hlízov	10	100350	2	c	NO	-	-	-	-	-	-	-	-	-
Hlízov	10	100360	1	c	NO	-	-	-	-	-	-	-	-	-
Hlízov	10	100370	2	c	NO	-	-	-	-	-	-	-	-	-
Hlízov	10	100380	1	f	NO	-	-	-	-	-	-	-	-	-
Hlízov	10	100400	1	c	NO	-	-	-	-	-	-	-	-	-
Hlízov	10	100410	1	f	NO	-	-	-	-	-	-	-	-	-
Hlízov	11	110010	13	f	LO	-	-	-	311	Delta10	-	12	u	-
Hlízov	11	110020	1	f	LO	-	-	-	311	delta10	-	11	v	-
Hlízov	11	110030	2	f	LO	-	-	-	380	-	5	8	u	14
Hlízov	11	110040	7	c	NO	353	-	-	-	-	-	-	-	-
Hlízov	11	110060	16	f	NO	-	-	-	-	-	5	-	-	-
Hlízov	11	110080	1	f	NO	-	-	-	-	-	-	-	-	-
Hlízov	11	110090	3	c	NO	-	-	-	-	-	-	-	-	-
Hlízov	11	110100	2	c	NO	711	-	-	-	-	-	-	-	-
Hlízov	11	110110	4	c	NO	110	-	-	-	-	-	-	-	-
Hlízov	11	110120	4	f	NO	-	-	-	-	-	-	-	-	-
Hlízov	11	110130	1	c	NO	-	-	-	-	-	-	-	-	-
Hlízov	11	110140	1	f	NO	-	-	-	-	-	-	-	-	-
Hlízov	11	110150	1	f	NO	-	-	-	-	-	-	-	-	-
Hlízov	11	110160	1	f	NO	-	-	-	-	-	-	-	-	-
Hlízov	11	110170	2	f	NO	-	-	-	-	-	-	-	-	-
Hlízov	11	110180	1	f	NO	-	-	-	-	-	-	-	-	-
Hlízov	11	110220	1	c	NO	-	-	-	-	-	-	-	-	-
Hlízov	11	110230	1	f	NO	-	-	-	-	-	-	-	-	-
Hlízov	11	110240	3	c	NO	-	-	-	-	-	-	-	-	-
Hlízov	11	110250	1	c	NO	-	-	-	-	-	-	-	-	-
Hlízov	11	110260	1	c	NO	-	-	-	-	-	-	-	-	-
Hlízov	11	110270	12	c	NO	-	-	-	-	-	-	-	-	-
Hlízov	11	110300	1	f	NO	-	-	-	-	-	-	-	-	-
Hlízov	11	110310	1	f	NO	-	-	-	-	-	-	-	-	-
Hlízov	11	110320	1	f	NO	-	-	-	-	-	-	-	-	-
Hlízov	11	110330	1	f	NO	-	-	-	-	-	-	-	-	-
Hlízov	11	110340	1	c	NO	-	-	-	-	-	-	-	-	-
Hlízov	11	110350	1	c	NO	-	-	-	-	-	-	-	-	-
Hlízov	11	110360	1	c	NO	-	-	-	-	-	-	-	-	-
Hlízov	11	110370	1	c	NO	-	-	-	-	-	-	-	-	-
Hlízov	11	110380	1	c	NO	-	-	-	-	-	-	-	-	-
Hlízov	12	120010	1	f	NO	-	-	-	-	-	-	-	-	-
Hlízov	14	140010	1	f	LO	-	-	-	310	delta10	-	-	-	-
Hlízov	14	140020	1	f	NO	-	-	-	-	-	-	-	-	-
Hlízov	15	150010	2	f	LO	-	-	-	310	delta10	-	25	U	-
Hlízov	15	150020	6	c	NO	-	-	-	-	-	-	-	-	-
Hlízov	15	150030	1	f	NO	-	-	-	-	-	-	-	-	-
Hlízov	15	150040	1	f	NO	-	-	-	-	-	-	-	-	-
Hlízov	15	150060	1	f	NO	221	-	-	-	-	-	-	-	-
Hlízov	15	150070	1	f	NO	-	-	-	-	-	-	-	-	-
Hlízov	15	150080	1	f	NO	-	-	-	-	-	-	-	-	-
Hlízov	16	160010	1	f	LO	-	-	-	110	GAMA10	1	24	U	15
Hlízov	16	160020	2	f	LO	-	-	-	110	GAMA10	-	37	U	-
Hlízov	16	160030	2	f	LO	-	-	-	110	GAMA10	5	19	U	14
Hlízov	16	160040	1	f	LO	-	-	-	110	GAMA10	2	41	U	-
Hlízov	16	160050	1	f	NO	-	-	-	-	-	8	-	-	18
Hlízov	16	160060	1	f	NO	-	-	-	-	-	8	-	-	14
Hlízov	16	160070	1	f	NO	-	-	-	-	-	8	-	-	20
Hlízov	16	160080	1	f	NO	-	-	-	-	-	10	-	-	19
Hlízov	16	160090	1	c	NO	-	-	-	-	-	2	-	-	15
Hlízov	16	160100	3	f	NO	-	-	-	-	-	6	-	-	-
Hlízov	16	160110	1	f	NO	-	-	-	-	-	-	-	-	-
Hlízov	16	160120	1	c	NO	-	-	-	-	-	-	-	-	-
Hlízov	16	160130	1	f	NO	-	-	-	-	-	10	-	-	-
Hlízov	16	160140	1	c	NO	-	-	-	-	-	-	-	-	-
Hlízov	16	160150	2	c	NO	550	-	-	-	-	-	-	-	-
Hlízov	16	160160	1	f	NO	221	-	-	-	-	-	-	-	-
Hlízov	16	160170	1	c	NO	112	-	-	-	-	-	-	-	-
Hlízov	16	160180	1	c	NO	-	-	-	-	-	-	-	-	-
Hlízov	16	160190	1	c	NO	212	-	-	-	-	-	-	-	-
Hlízov	16	160200	1	f	NO	-	24	-	-	-	-	-	-	-
Hlízov	16	160210	1	c	NO	111	-	-	-	-	-	-	-	-
Hlízov	16	160220	2	f	NO	111	-	-	-	-	-	-	-	-
Hlízov	16	160240	1	f	NO	-	-	-	-	-	1	-	-	-
Hlízov	16	160250	13	f	LO	-	-	-	311	DELTA10	-	23	U	-
Hlízov	16	160260	6	f	LO	-	-	-	110	GAMA10	-	24	u	-
Hlízov	16	160270	2	f	LO	-	-	-	110	GAMA10	-	31	u	-
Hlízov	16	160290	1	f	LO	-	-	-	110	GAMA10	-	16	u	-
Hlízov	16	160300	1	f	LO	-	-	-	311	DELTA10	-	19	u	-
Hlízov	16	160320	1	f	LO	-	-	-	110	GAMA10	-	15	u	-
Hlízov	16	160330	1	f	NO	-	-	-	110	GAMA10	-	28	u	-
Hlízov	16	160340	3	c	NO	-	-	-	-	-	-	-	-	-
Hlízov	16	160360	2	c	NO	-	-	-	-	-	-	-	-	-
Hlízov	16	160370	2	c	NO	-	-	-	-	-	-	-	-	-
Hlízov	16	160390	1	c	NO	-	-	-	-	-	-	-	-	-
Hlízov	16	160400	1	c	NO	-	-	-	-	-	-	-	-	-
Hlízov	16	160410	1	c	NO	-	-	-	-	-	-	-	-	-
Hlízov	16	160420	1	c	NO	-	-	-	-	-	-	-	-	-
Hlízov	16	160430	4	c	NO	-	-	-	-	-	-	-	-	-
Hlízov	16	160460	2	c	NO	-	-	-	-	-	-	-	-	-
Hlízov	16	160470	1	f	NO	-	-	-	-	-	-	-	-	-
Hlízov	16	160500	1	f	LO	-	-	-	110	GAMA10	-	30	u	-
Hlízov	16	160510	1	f	NO	-	-	-	-	-	-	-	-	-
Hlízov	16	160520	2	f	NO	-	-	-	-	-	-	-	-	-
Hlízov	16	160530	1	f	NO	-	-	-	-	-	-	-	-	-
Hlízov	16	160540	1	c	NO	-	-	-	-	-	-	-	-	-
Hlízov	16	160550	1	c	NO	-	-	-	-	-	-	-	-	-
Hlízov	16	160560	1	c	NO	-	-	-	-	-	-	-	-	-
Hlízov	16	160570	1	c	NO	-	-	-	-	-	-	-	-	-
Hlízov	16	160580	1	c	NO	-	-	-	-	-	-	-	-	-
Hlízov	16	160590	1	c	NO	-	-	-	-	-	-	-	-	-
Hlízov	16	160600	1	c	NO	-	-	-	-	-	-	-	-	-
Hlízov	16	160610	1	c	NO	-	-	-	-	-	-	-	-	-
Hlízov	16	160620	1	c	NO	-	-	-	-	-	-	-	-	-
Hlízov	16	160630	1	c	NO	-	-	-	-	-	-	-	-	-
Hlízov	16	160640	1	f	NO	-	-	-	-	-	8	-	-	12
Hlízov	16	160650	1	f	NO	-	-	-	-	-	-	-	-	-
Hlízov	16	160660	1	f	NO	-	-	-	-	-	-	-	-	-
Hlízov	16	160670	1	c	NO	-	-	-	-	-	-	-	-	-
Hlízov	16	160680	1	f	NO	-	-	-	-	-	-	-	-	-
Hlízov	16	160690	1	f	NO	-	-	-	-	-	-	-	-	-
Hlízov	16	160700	1	f	NO	-	-	-	-	-	-	-	-	-
Hlízov	16	160710	2	f	NO	-	-	-	-	-	-	-	-	-
Hlízov	16	160730	3	f	LO	-	-	-	110	GAMA10	-	41	u	-
Hlízov	16	160740	1	f	NO	-	-	-	-	-	-	-	-	-
Hlízov	16	160750	1	f	NO	-	-	-	-	-	-	-	-	-
Hlízov	16	160760	1	f	NO	-	-	-	-	-	-	-	-	-
Hlízov	16	160770	2	f	NO	-	-	-	-	-	-	-	-	-
Hlízov	16	160780	10	f	NO	-	-	-	-	-	-	-	-	-
Hlízov	16	160790	1	f	NO	-	-	-	-	-	-	-	-	-
Hlízov	16	160800	1	f	LO	-	-	-	110	GAMA10	4	24	u	-
Hlízov	16	160810	4	f	NO	-	-	-	-	-	-	-	-	-
Hlízov	16	160840	1	f	NO	-	-	-	-	-	-	-	-	-
Hlízov	16	160850	1	f	NO	-	-	-	-	-	-	-	-	-
Hlízov	16	160860	1	f	NO	-	-	-	-	-	-	-	-	-
Hlízov	16	160890	1	f	NO	-	-	-	-	-	-	-	-	-
Hlízov	16	160910	1	f	NO	-	-	-	-	-	-	-	-	-
Hlízov	16	160920	1	f	NO	-	-	-	-	-	-	-	-	-
Hlízov	16	160930	1	f	NO	-	-	-	-	-	-	-	-	-
Hlízov	16	160940	2	f	LO	-	-	-	110	GAMA10	-	-	-	-
Hlízov	16	160950	1	f	NO	-	-	-	-	-	-	-	-	-
Hlízov	16	160960	1	f	NO	-	-	-	-	-	-	-	-	-
Hlízov	16	160970	1	f	NO	-	-	-	-	-	-	-	-	-
Hlízov	16	160980	1	f	NO	-	-	-	-	-	-	-	-	-
Hlízov	16	160990	1	f	NO	-	-	-	-	-	-	-	-	-
Hlízov	16	161000	1	f	NO	-	-	-	-	-	-	-	-	-
Hlízov	16	161010	1	f	NO	-	-	-	-	-	-	-	-	-
Hlízov	16	161020	1	f	NO	-	-	-	-	-	5	-	-	14
Hlízov	16	161040	1	f	NO	-	-	-	-	-	-	-	-	-
Hlízov	16	161050	1	f	NO	-	-	-	-	-	-	-	-	-
Hlízov	16	161060	2	f	NO	-	-	-	-	-	-	-	-	-
Hlízov	16	161070	1	f	NO	-	-	-	-	-	-	-	-	-
Hlízov	16	161080	1	f	NO	-	-	-	-	-	-	-	-	-
Hlízov	16	161090	1	f	NO	-	-	-	-	-	-	-	-	-
Hlízov	16	161100	1	f	NO	-	-	-	-	-	-	-	-	-
Hlízov	16	161110	1	f	NO	-	-	-	-	-	-	-	-	-
Hlízov	16	161120	1	f	NO	-	-	-	-	-	-	-	-	-
Hlízov	16	161130	1	f	NO	-	-	-	-	-	-	-	-	-
Hlízov	16	161140	1	f	NO	-	-	-	-	-	-	-	-	-
Hlízov	18	180010	1	f	TO	-	-	12	-	-	-	-	-	-
Hlízov	18	180020	5	f	NO	-	-	-	-	-	8	-	-	-
Hlízov	18	180030	1	f	NO	-	-	-	-	-	-	-	-	-
Hlízov	21	210010	1	f	NO	-	-	-	-	-	-	-	-	-
Hlízov	21	210020	1	f	NO	-	-	-	-	-	-	-	-	-
Hlízov	22	220010	1	f	LO	-	-	-	311	DELTA10	-	15	U	-
Hlízov	22	220020	1	f	LO	-	-	-	311	DELTA10	-	13	V	-
Hlízov	22	220030	1	f	LO	-	-	-	311	DELTA10	7	12	V	-
Hlízov	22	220040	1	f	LO	-	-	-	311	DELTA10	5	10	V	-
Hlízov	22	220050	1	f	LO	-	-	-	311	DELTA10	-	10	V	-
Hlízov	22	220060	1	c	NO	-	-	-	-	-	-	-	-	-
Hlízov	22	220070	1	c	TO	-	-	27	-	-	-	-	-	-
Hlízov	22	220080	1	f	LO	-	-	-	531	ETA	2	-	-	-
Hlízov	22	220090	24	c	NO	552	-	-	-	-	-	-	-	-
Hlízov	22	220110	10	f	NO	111	-	-	-	-	-	-	-	-
Hlízov	22	220120	1	c	NO	-	-	-	-	-	-	-	-	-
Hlízov	22	220130	3	c	NO	-	-	-	-	-	-	-	-	-
Hlízov	22	220150	1	c	NO	-	-	-	-	-	-	-	-	-
Hlízov	22	220160	2	c	NO	-	-	-	-	-	-	-	-	-
Hlízov	22	220180	1	f	NO	-	-	-	-	-	-	-	-	-
Hlízov	22	220190	2	f	NO	-	-	-	-	-	-	-	-	-
Hlízov	22	220200	1	f	LO	-	-	-	311	DELTA10	1	-	-	16
Hlízov	22	220220	1	f	NO	-	-	-	-	-	-	-	-	-
Hlízov	22	220230	1	f	NO	-	-	-	-	-	-	-	-	-
Hlízov	22	220300	2	f	NO	-	-	-	-	-	-	-	-	-
Hlízov	22	220310	2	f	NO	-	-	-	-	-	-	-	-	-
Hlízov	22	220320	4	f	NO	-	-	-	-	-	-	-	-	-
Hlízov	22	220330	3	f	NO	-	-	-	-	-	-	-	-	-
Hlízov	22	220340	1	f	NO	-	-	-	-	-	-	-	-	-
Hlízov	22	220350	1	f	NO	-	-	-	-	-	-	-	-	-
Hlízov	22	220360	1	f	NO	-	-	-	-	-	-	-	-	-
Hlízov	22	220370	1	f	NO	-	-	-	-	-	-	-	-	-
Hlízov	22	220380	1	f	NO	-	-	-	-	-	-	-	-	-
Hlízov	22	220390	1	f	NO	-	-	-	-	-	-	-	-	-
Hlízov	22	220400	1	f	NO	-	-	-	-	-	-	-	-	-
Hlízov	22	220410	1	f	NO	-	-	-	-	-	-	-	-	-
Hlízov	22	220420	1	f	NO	-	-	-	-	-	-	-	-	-
Hlízov	22	220430	1	f	NO	-	-	-	-	-	-	-	-	-
Hlízov	22	220440	1	f	NO	-	-	-	-	-	-	-	-	-
Hlízov	23	230030	1	c	NO	570	-	-	-	-	-	-	-	-
Hlízov	24	240010	1	c	LO	-	-	-	110	GAMA10	-	20	U	-
Hlízov	24	240020	1	c	NO	-	-	-	-	-	-	-	-	-
Hlízov	25	250010	1	c	NO	-	-	-	-	-	-	-	-	-
Hlízov	25	250020	1	c	NO	-	-	-	-	-	-	-	-	-
Hlízov	26	260010	2	c	NO	-	-	-	-	-	-	-	-	-
Hlízov	26	260020	1	f	NO	-	-	-	-	-	-	-	-	-
Hlízov	26	260030	3	c	NO	-	-	-	-	-	-	-	-	-
Hlízov	30	300010	1	f	LO	-	-	-	333	DELTA30	5	16	u	17
Hlízov	30	300020	1	f	LO	-	-	-	110	GAMA10	-	30	u	-
Hlízov	30	300030	1	f	LO	-	-	-	110	GAMA10	5	23	u	-
Hlízov	30	300040	1	f	LO	-	-	-	310	DELTA10	-	14	u	-
Hlízov	30	300050	1	f	LO	-	-	-	310	DELTA10	-	9	u	-
Hlízov	30	300060	2	f	NO	-	-	-	-	-	10	-	-	24
Hlízov	30	300070	1	f	NO	-	-	-	-	-	5	-	-	-
Hlízov	30	300080	3	c	NO	-	-	-	-	-	-	-	-	-
Hlízov	30	300090	3	c	NO	570	-	-	-	-	-	-	-	-
Hlízov	30	300100	1	c	NO	-	252	-	-	-	-	-	-	-
Hlízov	30	300110	1	c	NO	570	-	-	-	-	-	-	-	-
Hlízov	30	300120	4	c	NO	-	-	-	-	-	-	-	-	24
Hlízov	30	300130	2	c	NO	-	-	-	-	-	-	-	-	-
Hlízov	30	300140	1	c	NO	-	-	-	-	-	-	-	-	-
Hlízov	30	300150	1	c	NO	-	-	-	-	-	-	-	-	-
Hlízov	30	300160	3	f	NO	-	-	-	-	-	-	-	-	-
Hlízov	30	300170	2	c	NO	-	-	-	-	-	-	-	-	-
Hlízov	30	300180	2	c	NO	-	-	-	-	-	-	-	-	-
Hlízov	30	300190	1	c	NO	-	-	-	-	-	-	-	-	-
Hlízov	30	300200	1	c	NO	-	-	-	-	-	-	-	-	-
Hlízov	30	300210	2	c	NO	-	-	-	-	-	-	-	-	-
Hlízov	30	300220	1	f	NO	-	-	-	-	-	-	-	-	-
Hlízov	30	300230	1	c	NO	-	-	-	-	-	-	-	-	-
Hlízov	30	300240	2	f	LO	-	-	-	311	DELTA10	7	5	V	18
Hlízov	30	300250	6	f	NO	-	-	-	-	-	7	-	-	14
Hlízov	30	300260	1	f	NO	-	-	-	-	-	-	-	-	-
Hlízov	32	320010	4	f	LO	-	-	-	110	GAMA10	5	30	u	-
Hlízov	32	320030	1	f	LO	-	-	-	110	GAMA10	-	25	u	-
Hlízov	32	320040	1	f	LO	-	-	-	310	DELTA10	-	21	v	-
Hlízov	32	320050	4	f	NO	-	-	-	-	-	-	-	-	-
Hlízov	32	320060	1	f	NO	-	-	-	-	-	-	-	-	-
Hlízov	32	320070	1	f	NO	-	-	-	-	-	-	-	-	-
Hlízov	32	320080	4	c	NO	-	24	-	-	-	-	-	-	-
Hlízov	32	320090	2	c	NO	110	-	-	-	-	-	-	-	-
Hlízov	32	320120	5	f	NO	-	-	-	-	-	8	-	-	14
Hlízov	32	320130	1	f	NO	-	-	-	-	-	2	-	-	10
Hlízov	32	320140	1	f	NO	-	-	-	-	-	8	-	-	18
Hlízov	32	320150	1	c	NO	-	-	-	-	-	-	-	-	-
Hlízov	32	320180	5	c	NO	-	-	-	-	-	-	-	-	-
Hlízov	32	320190	1	c	NO	-	-	-	-	-	-	-	-	-
Hlízov	32	320200	1	c	NO	-	-	-	-	-	-	-	-	-
Hlízov	32	320240	1	c	NO	-	-	-	-	-	-	-	-	-
Hlízov	32	320260	5	f	NO	-	-	-	-	-	-	-	-	-
Hlízov	32	320270	1	f	NO	-	-	-	-	-	-	-	-	-
Hlízov	32	320280	4	f	NO	-	-	-	-	-	-	-	-	-
Hlízov	32	320300	1	c	NO	-	-	-	-	-	-	-	-	-
Hlízov	32	320310	3	f	NO	-	-	-	-	-	-	-	-	-
Hlízov	32	320320	2	f	NO	-	-	-	-	-	-	-	-	-
Hlízov	32	320340	2	f	NO	-	-	-	-	-	-	-	-	-
Hlízov	32	320380	2	f	NO	-	-	-	-	-	-	-	-	-
Hlízov	32	320520	5	c	NO	-	-	-	-	-	-	-	-	-
Hlízov	32	320550	4	f	NO	-	-	-	-	-	-	-	-	-
Hlízov	32	320570	2	f	NO	-	-	-	-	-	-	-	-	-
Hlízov	32	320590	5	f	NO	-	-	-	-	-	-	-	-	-
Hlízov	32	320620	2	f	NO	-	-	-	-	-	-	-	-	-
Hlízov	32	320630	2	f	NO	-	-	-	-	-	-	-	-	-

## Sheet: Fragments
Feature	Part	Level	ID_vessel	ID_frag	WEIGHT	SIZE	ABRAZE	WALL	HEIGHT
1	-	-	10010	1001001	9	33	1	8	-
1	-	-	10010	1001002	3	28	1	7	-
1	-	-	10020	1002001	35	64	2	11	-
1	-	-	10020	1002002	28	57	1	12	-
3	-	1	30010	3001001	9	50	1	7	-
3	-	1	30010	3001002	6	42	1	7	-
3	-	1	30010	3001003	3	27	2	5	-
3	-	1	30020	3002001	5	34	1	7	-
3	-	1	30020	3002002	4	33	1	8	-
3	-	1	30030	3003001	9	31	3	85	-
3	-	1	30040	3004001	8	32	1	10	-
3	-	1	30040	3004002	4	36	2	10	-
3	-	1	30040	3004003	3	24	2	10	-
3	-	1	30040	3004004	3	26	1	10	-
3	-	1	30060	3006001	28	48	1	18	-
3	-	1	30070	3007001	29	62	1	12	-
3	-	1	30080	3008001	13	56	1	14	-
3	-	1	30080	3008002	12	52	1	14	-
3	-	1	30090	3009001	14	50	1	17	-
4	-	1	40030	4003001	3	26	1	6	-
6	-	1	60010	6001001	4	34	1	7	-
6	-	-	60010	6001002	2	18	1	7	-
6	-	-	60010	6001003	1	13	1	7	-
6	-	1	60020	6002001	38	32	2	5	-
7	-	-	70010	7001001	3	26	1	5	-
7	-	-	70020	7002001	3	32	1	6	-
7	-	-	70030	7003001	12	48	1	10	-
8	-	-	80010	8001001	6	40	1	6	-
9	z	2	90010	9001001	37	58	1	6	-
9	z	2	90010	9001003	18	62	1	6	-
9	z	1	90010	9001007	14	45	1	6	-
9	z	2	90010	9001006	14	39	1	6	-
9	z	2	90010	9001004	9	46	1	6	-
9	z	1	90010	9001008	7	34	1	6	-
9	z	2	90010	9001005	7	38	1	6	-
9	z	2	90010	9001002	5	33	1	6	-
9	v	0	90010	9001009	3	27	1	6	-
9	v	2	90010	9001010	3	29	1	6	-
9	z	2	90010	9001011	3	30	1	6	-
9	v	1	90020	9002001	19	79	1	6	7
9	-	3	90020	9002002	8	65	2	6	5
9	-	3	90020	9002003	5	43	1	6	-
9	-	3	90030	9003001	3	34	1	4	-
9	v	2	90040	9004003	7	41	1	6	-
9	-	3	90040	9004001	7	44	1	6	-
9	-	3	90040	9004002	7	43	1	6	-
9	v	0	90040	9004004	4	32	1	6	-
9	v	3	90040	9004005	4	33	1	6	-
9	z	1	90040	9004007	2	33	1	6	-
9	-	3	90040	9004006	2	32	1	6	-
9	z	1	90050	9005001	10	50	2	6	-
9	-	3	90060	9006001	13	48	2	7	-
9	v	1	90070	9007002	5	31	1	7	-
9	z	1	90070	9007001	4	39	1	7	-
9	v	1	90080	9008001	4	41	2	5	-
9	v	1	90090	9009001	6	45	2	4	-
9	v	1	90100	9010001	4	34	1	4	-
9	v	1	90100	9010002	2	28	1	4	-
9	v	2	90110	9011001	22	59	1	7	6
9	z	2	90130	9013001	4	36	2	5	-
9	v	1	90140	9014001	22	63	2	8	-
9	v	1	90150	9015001	5	39	2	5	-
9	v	1	90160	9016001	4	38	2	4	-
9	z	2	90170	9017001	5	34	1	4	-
9	v	1	90190	9019001	3	37	2	5	-
9	z	1	90200	9020001	10	52	2	6	-
9	-	3	90220	9022001	10	47	2	8	-
9	-	3	90220	9022002	9	39	2	8	-
9	z	2	90230	9023001	5	37	2	6	-
9	-	3	90240	9024001	21	63	1	8	-
9	z	1	90250	9025002	11	53	1	7	-
9	v	0	90250	9025004	7	39	1	56	-
9	v	1	90250	9025003	7	51	1	5	-
9	-	3	90250	9025001	7	46	1	6	-
9	v	0	90250	9025005	6	39	1	6	-
9	v	2	90260	9026001	11	42	3	8	-
9	v	3	90270	9027001	23	60	2	9	-
9	v	3	90280	9028001	5	38	2	5	-
9	v	3	90280	9028002	2	32	1	5	-
9	-	3	90290	9029001	14	47	3	13	-
9	-	3	90300	9030001	19	53	1	7	6
9	v	1	90310	9031001	2	28	1	4	-
9	v	0	90320	9032001	3	35	1	5	-
9	v	1	90330	9033001	2	30	1	5	-
9	z	1	90340	9034001	3	40	1	4	-
9	v	1	90350	9035001	4	38	3	5	-
9	z	1	90370	9037001	7	31	3	8	-
9	v	1	90380	9038001	5	34	1	6	-
9	v	0	90390	9039001	3	39	1	4	-
9	-	3	90400	9040001	3	38	1	4	-
9	-	3	90410	9041001	3	34	1	5	-
9	z	2	90420	9320021	2	26	1	4	-
9	-	3	90430	9043001	4	37	1	4	-
9	v	1	90440	9044001	4	33	1	5	-
9	z	2	90450	9045001	6	36	1	7	-
9	z	2	90460	9046001	6	32	1	11	-
9	-	3	90470	9047001	7	36	3	8	-
9	z	1	90480	9048001	15	64	2	8	-
9	z	3	90490	9049001	420	150	3	11	55
9	z	3	90490	9049004	226	148	3	13	22
9	v	1	90490	9049005	76	83	2	11	-
9	z	3	90490	9049003	70	109	2	11	-
9	z	3	90490	9049002	67	89	2	11	-
9	v	1	90490	9049007	45	48	3	11	-
9	-	3	90490	9049008	45	57	3	11	-
9	v	1	90490	9049006	39	58	3	11	-
9	v	2	90490	9049009	17	57	2	11	-
9	v	1	90490	9049010	15	43	3	11	-
9	v	1	90490	9049011	14	34	2	11	-
9	v	1	90490	9049012	4	30	2	11	-
9	-	3	90500	9050001	206	125	1	17	10
9	z	1	90510	9051001	25	62	1	8	7
9	v	0	90510	9051008	17	57	1	7	-
9	z	2	90510	9051002	17	83	1	5	-
9	v	0	90510	9051011	16	52	1	7	-
9	v	0	90510	9051003	15	61	1	6	-
9	v	1	90510	9051005	14	53	1	6	-
9	z	1	90510	9051009	10	44	1	7	-
9	v	1	90510	9051006	7	52	1	6	-
9	v	1	90510	9051015	6	40	1	6	-
9	z	1	90510	9051004	6	43	1	5	-
9	z	1	90510	9051013	6	38	1	7	-
9	v	0	90510	9051016	4	29	1	6	-
9	v	1	90510	9051017	4	32	1	6	-
9	z	1	90510	9051018	4	39	1	6	-
9	z	0	90510	9051019	3	37	1	6	-
9	v	1	90510	9051014	3	29	1	6	-
9	z	1	90510	9051010	3	3	1	6	-
9	z	1	90510	9051012	3	33	1	6	-
9	-	3	90510	9051007	3	40	1	6	-
9	v	1	90520	9052001	31	66	2	7	6
9	z	1	90530	9053001	15	62	1	6	-
9	-	3	90540	9054001	26	62	2	7	-
9	z	2	90560	9056001	13	62	1	4	-
9	z	1	90570	9057001	20	72	1	7	-
9	v	0	90570	9057002	19	58	2	8	-
9	v	1	90570	9057003	9	56	1	6	-
9	v	1	90570	9057004	5	33	2	6	-
9	v	1	90570	9057005	2	36	2	6	-
9	v	0	90590	9059001	6	33	1	9	-
9	-	1	90600	9060001	6	34	1	6	-
9	v	0	90630	9063001	2	24	1	4	-
9	-	3	90640	9064001	10	34	3	11	-
9	-	3	90650	9065001	35	57	1	11	-
9	v	3	90660	9066001	90	85	2	12	-
9	z	2	90660	9066004	59	69	3	12	-
9	v	3	90660	9066002	40	67	3	12	-
9	z	1	90660	9066005	38	86	1	12	-
9	z	1	90660	9066003	37	79	3	12	-
9	v	1	90660	9066006	30	55	1	10	-
9	z	2	90670	9067001	76	95	2	9	9
9	v	0	90680	9068003	104	98	1	12	8
9	v	1	90680	9068010	90	99	1	12	8
9	v	0	90680	9068004	79	79	2	12	-
9	v	0	90680	9068001	70	90	1	12	-
9	v	0	90680	9068007	66	75	2	12	-
9	v	0	90680	9068014	64	85	1	12	-
9	v	0	90680	9068009	62	70	1	12	-
9	v	1	90680	9068019	55	69	1	12	-
9	v	1	90680	9068020	55	73	1	12	-
9	z	0	90680	9068005	54	78	2	12	-
9	v	0	90680	9068008	51	73	2	12	-
9	v	0	90680	9068012	50	83	2	12	-
9	v	0	90680	9068013	47	58	2	12	-
9	z	1	90680	9068011	45	79	1	12	-
9	v	0	90680	9068002	40	91	1	12	-
9	v	0	90680	9068015	22	67	1	12	-
9	v	0	90680	9068016	17	45	1	12	-
9	v	3	90680	9068017	17	42	1	12	-
9	v	0	90680	9068006	16	48	1	12	-
9	v	3	90680	9068018	8	28	1	12	-
9	-	3	90690	9069002	27	59	3	14	-
9	v	2	90690	9069001	18	58	2	8	-
9	v	2	90690	9069003	18	47	2	9	-
9	v	0	90700	9070001	30	62	3	9	-
9	v	0	90700	9070003	14	59	1	8	-
9	z	0	90700	9070002	9	43	1	5	-
9	v	1	90710	9071001	22	50	2	9	-
9	-	3	90730	9073001	14	51	2	7	-
9	v	1	90740	9074001	244	113	3	16	10
9	v	3	90750	9075001	64	79	3	12	-
9	v	2	90750	9075002	50	78	3	12	-
9	v	3	90750	9075003	15	42	3	12	-
9	-	1	90750	9075004	12	41	3	12	-
9	z	2	90750	9075006	8	30	2	10	-
9	v	1	90750	9075005	4	25	3	8	-
9	z	2	90760	9076001	38	69	2	11	-
9	z	1	90770	9077001	12	40	1	8	-
9	v	3	90780	9078001	20	56	1	10	-
9	v	1	90800	9080001	330	131	2	15	13
9	v	1	90800	9080002	80	79	2	15	-
9	v	1	90800	9080003	64	73	2	15	-
9	v	1	90800	9080004	18	36	2	15	-
9	v	1	90800	9080005	9	42	2	15	-
9	-	3	90810	9081001	26	46	1		-
9	z	1	90820	9082001	-	-	-	-	-
9	-	3	90830	9083001	68	76	3	12	-
9	v	0	90840	9084001	9	40	1	8	-
9	v	2	90850	9085001	46	72	2	10	-
9	v	3	90860	9086001	104	80	3	12	-
9	v	1	90870	9087001	55	70	1	8	-
9	v	1	90880	9088001	30	53	1	7	-
9	z	1	90890	9089001	80	91	3	14	-
9	z	1	90890	9089003	25	41	3	14	-
9	z	1	90890	9089002	-	-	-	-	-
9	z	2	90900	9090001	25	53	3	10	-
9	-	3	90910	9091001	19	49	2	6	-
9	z	0	90920	9092001	9	39	1	7	-
9	-	3	90920	9092003	9	40	1	7	-
9	v	1	90920	9092002	7	40	1	7	-
9	z	1	90940	9094002	7	42	1	5	-
9	z	1	90940	9094001	6	42	1	4	-
9	z	1	90940	9094003	4	38	1	5	-
9	z	0	90940	9094004	3	32	1	5	-
9	z	0	90940	9094005	3	35	1	5	-
9	v	1	90940	9094006	3	36	1	5	-
9	z	2	90940	9094007	3	25	1	5	-
9	-	3	90940	9094008	3	25	1	5	-
9	v	1	90940	9094009	2	30	1	5	-
9	v	1	90950	9095001	6	49	1	4	-
9	z	0	90950	9095005	4	33	1	4	-
9	v	0	90950	9095007	3	28	1	4	-
9	z	0	90950	9095004	3	32	1	4	-
9	v	1	90950	9095003	3	30	1	4	-
9	-	3	90950	9095002	3	34	1	4	-
9	z	1	90950	9095006	2	25	1	4	-
9	v	0	90960	9096002	10	68	1	5	-
9	v	0	90960	9096006	6	59	1	5	-
9	v	1	90960	9096001	6	55	1	4	-
9	v	1	90960	9096004	6	48	1	5	-
9	-	3	90960	9096003	6	51	1	5	-
9	v	1	90960	9096005	1	23	1	5	-
9	-	3	90970	9097001	32	73	1	11	-
9	v	1	90970	9097003	22	63	1	7	-
9	v	0	90970	9097004	20	53	1	7	-
9	v	1	90970	9097007	13	46	1	9	-
9	v	0	90970	9097002	11	40	1	10	-
9	z	1	90970	9097005	9	37	1	6	-
9	z	1	90970	9097006	9	43	1	6	-
9	-	3	90970	9097008	9	41	1	6	-
9	z	1	90970	9097009	3	28	1	5	-
9	-	3	90970	9097010	3	24	1	6	-
9	-	3	90990	9099002	14	64	1	5	-
9	-	3	90990	9099004	14	54	1	5	-
9	z	0	90990	9099001	13	55	1	5	-
9	z	0	90990	9099005	13	51	1	6	-
9	v	1	90990	9099003	9	42	1	5	-
9	V	3	90990	9099006	9	44	2	5	-
9	v	1	90990	9099007	4	33	1	5	-
9	-	3	90990	9099010	4	43	1	4	-
9	v	1	90990	9099008	3	32	1	4	-
9	v	1	90990	9099009	2	28	1	4	-
9	v	1	91000	9100001	10	48	1	6	-
9	v	0	91010	9101001	6	35	1	5	-
9	-	3	91020	9102001	5	35	1	6	-
9	z	2	91030	9103001	4	42	1	4	-
9	-	3	91030	9103002	3	30	1	4	-
9	v	3	91040	9104001	8	46	1	5	-
9	v	0	91040	9104002	4	33	1	5	-
9	v	1	91060	9106001	7	33	2	7	-
9	v	2	91060	9106002	4	31	1	5	-
9	v	2	91070	9107001	4	32	2	5	-
9	z	1	91080	9108001	5	28	1	8	-
9	v	2	91090	9109001	7	34	1	10	-
9	v	1	91100	9110003	8	45	1	5	-
9	z	1	91100	9110001	8	43	1	5	-
9	v	1	91100	9110002	5	39	1	5	-
9	-	3	91110	9111001	3	29	1	5	-
9	z	1	91120	9112002	5	37	1	5	-
9	z	2	91120	9112001	3	29	1	6	-
9	v	1	91130	9113001	7	44	2	7	-
9	v	1	91150	9115001	5	30	1	6	-
9	v	0	91160	9116002	4	34	2	5	-
9	-	3	91160	9116001	4	35	2	5	-
9	v	0	91170	9117001	3	26	1	5	-
9	v	1	91190	9119001	4	30	2	4	-
9	z	1	91200	9120001	2	35	1	3	-
9	v	1	91210	9121001	6	49	1	4	-
9	z	2	91230	9123001	7	30	3	10	-
9	v	0	91250	9125001	8	30	1	9	-
9	v	0	91260	9126001	7	38	1	5	-
9	z	2	91290	9129001	5	26	1	6	-
9	-	3	91300	9130001	38	29	1	7	-
9	-	3	91310	9131001	10	33	1	10	-
9	z	1	91320	9132001	15	42	2	10	-
9	z	1	91330	9133001	5	38	1		-
9	z	2	91360	9136005	16	50	2	7	-
9	v	1	91360	9136004	12	55	1	7	-
9	z	2	91360	9136001	6	36	2	8	-
9	z	2	91360	9136002	6	39	2	8	-
9	z	2	91360	9136003	6	36	2	8	-
9	v	1	91360	9136006	4	29	1	7	-
9	-	3	91360	9136007	4	30	1	7	-
9	z	1	91370	9137001	10	40	1	9	-
9	z	1	91410	9141001	23	63	1	9	-
9	v	1	91420	9142004	21	57	1	11	-
9	-	3	91420	9142001	17	55	1	9	-
9	-	3	91420	9142002	12	41	1	10	-
9	v	2	91420	9142003	11	48	1	10	-
9	z	1	91430	9143001	12	49	1	6	-
9	z	1	91430	9143002	8	45	1	6	-
9	z	1	91430	9143003	8	43	1	6	-
9	z	1	91430	9143004	8	46	1	6	-
9	-	3	91440	9144001	10	39	1	13	-
9	-	3	91450	9145002	8	45	1	8	-
9	v	1	91450	9145001	6	37	1	6	-
9	v	1	91450	9145003	5	32	1	7	-
9	v	1	91450	9145004	2	21	1	6	-
9	-	3	91460	9146001	26	56	1	10	-
9	v	0	91460	9146002	15	42	1	10	-
9	v	2	91470	9147001	6	39	1	4	-
9	v	2	91470	9147002	3	31	1	4	-
9	v	2	91470	9147003	2	23	1	4	-
9	v	1	91490	9149001	8	45	2	6	-
9	-	3	91500	9150001	38	68	2	9	-
9	z	1	91510	9151002	8	38	1	9	-
9	-	3	91510	9151001	5	36	1	8	-
9	z	1	91520	9152002	23	55	2	8	-
9	z	2	91520	9152001	19	60	2	8	-
9	z	1	91520	9152003	7	36	2	8	-
9	z	1	91530	9153002	31	62	2	9	-
9	z	1	91530	9153001	10	43	2	9	-
9	z	1	91550	9155001	21	59	1	12	-
9	-	3	91560	9156001	15	50	1	10	-
9	-	3	91570	9157001	12	39	1	10	-
9	-	1	91580	9158004	22	56	1	9	-
9	z	1	91580	9158001	15	48	1	7	-
9	v	3	91580	9158006	15	49	1	10	-
9	v	3	91580	9158005	14	42	1	10	-
9	z	1	91580	9158008	12	44	1	9	-
9	v	0	91580	9158007	8	35	1	10	-
9	v	1	91580	9158009	5	35	1	9	-
9	z	1	91580	9158010	5	30	1	7	-
9	z	1	91580	9158002	4	31	1	7	-
9	z	1	91580	9158003	3	27	1	7	-
9	z	2	91590	9159001	18	50	2	9	-
9	z	2	91590	9159002	18	46	2	9	-
9	v	1	91590	9159006	11	50	1	7	-
9	v	1	91590	9159007	11	39	1	7	-
9	v	1	91590	9159004	10	42	2	9	-
9	v	1	91590	9159005	10	44	2	9	-
9	v	1	91590	9159003	5	35	2	9	-
9	v	1	91590	9159008	5	35	2	7	-
9	v	3	91600	9160001	29	61	1	17	-
9	v	1	91620	9162003	59	89	3	10	7
9	v	3	91620	9162001	50	111	2	9	10
9	v	0	91620	9162003	30	70	1	10	-
9	v	2	91620	9162008	25	59	2	10	-
9	v	2	91620	9162004	24	64	2	10	-
9	v	0	91620	9162001	21	68	1	10	-
9	v	1	91620	9162002	21	64	3	10	-
9	z	1	91620	9162005	20	55	2	10	-
9	z	3	91620	9162006	20	50	2	10	-
9	z	1	91620	9162007	17	51	1	9	-
9	v	0	91620	9162002	9	43	1	10	-
9	z	1	91620	9162009	7	34	2	9	-
9	z	1	91620	9162004	6	37	1	10	-
9	v	0	91630	9163001	29	58	1	14	-
9	v	1	91630	9163002	23	59	1	11	-
9	z	1	91650	9165001	18	50	2	10	-
9	v	1	91660	9166001	9	36	1	9	-
9	v	1	91680	9168001	13	46	1	13	-
9	-	3	91690	9169001	47	75	2	15	-
9	z	1	91700	9170001	58	84	1	19	-
9	z	2	91700	9170002	56	79	1	17	-
9	v	1	91720	9172001	48	86	1	14	8
9	v	0	91730	9173002	15	59	1	10	-
9	v	0	91730	9173001	12	48	1	10	-
9	z	0	91730	9173003	6	44	2	9	-
9	z	1	91740	9174001	80	110	2	14	5
9	z	1	91740	9174002	20	79	2	14	-
9	v	3	91750	9175001	24	55	2	12	-
9	-	3	91750	9175002	7	41	1	9	-
9	z	1	91760	9176001	17	34	2	13	-
9	-	3	91760	9176002	8	36	2	12	-
9	v	0	91770	9177007	38	68	3	11	-
9	v	2	91770	9177002	36	71	3	11	-
9	v	2	91770	9177001	35	84	1	11	-
9	v	0	91770	9177011	23	50	1	11	-
9	v	2	91770	9177013	23	54	2	11	-
9	v	2	91770	9177006	22	50	3	11	-
9	z	2	91770	9177012	19	51	1	11	-
9	z	1	91770	9177010	18	48	1	11	-
9	v	0	91770	9177003	16	48	2	11	-
9	v	0	91770	9177004	16	43	2	11	-
9	v	0	91770	9177005	16	49	2	11	-
9	v	0	91770	9177008	15	48	1	11	-
9	v	3	91770	9177016	15	43	1	11	-
9	v	3	91770	9177017	15	44	1	11	-
9	v	3	91770	9177015	14	37	1	11	-
9	-	3	91770	9177014	12	40	1	11	-
9	v	2	91770	9177018	11	38	1	11	-
9	v	1	91770	9177019	6	33	1	11	-
9	z	1	91770	9177020	6	31	1	11	-
9	-	3	91770	9177022	6	30	1	11	-
9	v	0	91770	9177021	5	30	1	11	-
9	v	0	91770	9177009	3	35	1	11	-
9	z	2	91780	9178002	20	43	1	15	-
9	v	1	91780	9178003	18	50	2	11	-
9	v	1	91780	9178001	15	48	3	10	-
9	v	2	91780	9178004	14	42	2	12	-
9	z	2	91780	9178005	14	44	1	11	-
9	z	1	91780	9178008	13	43	2	7	-
9	-	3	91780	9178006	11	40	3	11	-
9	v	1	91780	9178007	9	37	2	9	-
9	v	1	91780	9178009	9	39	2	7	-
9	v	0	91780	9178010	6	35	1	9	-
9	v	0	91780	9178011	6	40	1	9	-
9	z	2	91780	9178012	4	28	1	9	-
9	v	1	91800	9180001	4	25	1	6	-
9	-	-	91810	9181001	3	26	1	8	-
9	-	-	91820	9182001	3	22	1	9	-
9	-	-	91830	9183001	1	17	1	6	-
9	v	3	91840	9184001	4	25	1	10	-
9	v	0	91850	9185001	9	40	1	8	-
9	v	0	91860	9186001	6	27	1	9	-
9	v	0	91870	9187001	7	32	1	12	-
9	-	-	91880	9188001	6	25	1	12	-
9	v	0	91890	9189001	10	31	1	16	-
9	-	-	91900	9190001	5	28	1	11	-
9	-	-	91910	9191001	6	29	1	12	-
9	z	1	91920	9192001	6	26	1	10	-
9	-	-	91930	9193001	4	21	1	13	-
9	v	0	91940	9194001	6	27	1	14	-
9	v	0	91950	9195001	5	31	1	10	-
9	-	3	91960	9196001	4	24	1	7	-
9	-	-	91970	9197001	7	28	1	17	-
9	-	-	91980	9198001	4	22	1	12	-
9	-	-	91990	9199001	4	26	1	15	-
9	-	-	92000	9200001	3	27	1	14	-
9	-	-	92010	9201001	4	25	1	9	-
9	-	-	92020	9202001	4	23	1	10	-
9	-	-	92030	9203001	4	23	1	8	-
9	-	-	92040	9204001	3	24	1	10	-
9	-	-	92050	9205001	3	25	1	11	-
9	-	-	92060	9206001	3	25	1	12	-
9	-	-	92070	9207001	3	23	1	11	-
9	-	-	92080	9208001	3	20	1	10	-
9	-	-	92090	9209001	3	24	1	8	-
9	-	-	92100	9210001	3	22	1	10	-
9	-	-	92110	9211001	2	20	1	10	-
9	-	-	92120	9212001	2	21	1	6	-
9	-	-	92130	9213001	2	20	1	10	-
9	-	-	92140	9214001	2	20	1	7	-
9	-	-	92150	9215001	2	16	1	9	-
9	-	-	92160	9216001	1	16	1	8	-
9	-	-	92170	9217001	3	29	1	5	-
9	-	-	92180	9218001	2	20	1	6	-
9	-	-	92190	9219001	3	26	1	5	-
9	v	1	92200	9220001	2	27	1	4	-
9	v	1	92210	9221001	1	23	1	3	-
9	z	2	92220	9222001	2	25	1	5	-
9	z	2	92230	9223001	3	24	1	6	-
9	z	1	92240	9224001	3	26	1	5	-
9	v	1	92250	9225001	2	25	1	5	-
9	z	0	92260	9226001	2	26	1	4	-
9	z	1	92270	9227001	2	30	1	4	-
9	-	3	92280	9228001	2	24	1	4	-
9	-	-	92290	9229001	2	24	1	4	-
9	-	-	92300	9230001	3	25	1	6	-
9	-	-	92310	9231001	2	22	1	5	-
9	-	-	92320	9232001	3	24	1	7	-
9	-	-	92330	9233001	2	28	1	7	-
9	-	-	92340	9234001	3	26	1	6	-
9	-	-	92350	9235001	3	28	1	6	-
9	-	-	92360	9236001	2	26	1	5	-
9	-	-	92370	9237001	2	27	1	4	-
9	-	-	92380	9238001	2	22	1	5	-
9	-	-	92390	9239001	2	25	1	5	-
9	-	-	92400	9240001	2	24	1	4	-
9	-	-	92410	9241001	2	20	1	6	-
9	-	-	92420	9242001	2	19	1	6	-
9	-	-	92430	9243001	2	19	1	6	-
9	z	0	92440	9244001	2	34	1	4	-
9	-	-	92450	9245001	2	22	1	5	-
9	-	-	92460	9246001	1	21	1	4	-
9	-	-	92470	9247001	2	17	1	7	-
9	-	-	92480	9248001	1	21	1	6	-
9	-	-	92490	9249001	1	21	1	4	-
9	-	-	92500	9250001	1	22	1	4	-
9	-	-	92510	9251001	1	17	1	4	-
9	-	-	92520	9252001	1	25	1	3	-
9	-	-	92530	9253001	1	20	1	3	-
9	-	-	92540	9254001	1	21	1	5	-
9	-	-	92550	9255001	1	25	1	4	-
9	-	-	92560	9256001	1	19	1	5	-
9	-	-	92570	9257001	1	22	1	4	-
9	-	-	92580	9258001	1	21	1	3	-
9	-	-	92590	9259001	1	19	1	6	-
9	-	-	92600	9260001	1	20	1	4	-
9	-	-	92610	9261001	1	15	1	6	-
9	-	-	92620	9262001	1	19	1	4	-
9	-	-	92630	9263001	1	16	1	4	-
9	-	-	92640	9264001	1	18	1	3	-
9	-	-	92650	9265001	1	12	1	6	-
9	-	-	92660	9266001	1	19	1	3	-
9	z	2	92670	9267001	9	33	1	11	-
9	v	1	92680	9268001	6	26	1	10	-
9	-	-	92690	9269001	4	23	1	9	-
9	-	-	92700	9270001	3	23	1	11	-
9	z	2	92710	9271001	3	32	1	5	-
9	v	3	92720	9272001	5	35	1	5	-
9	-	3	92730	9273001	6	29	1	10	-
9	z	2	92740	9274001	6	32	1	7	-
9	-	3	92750	9275001	4	22	1	10	-
9	v	1	92760	9276001	5	30	1	9	-
9	z	1	92770	9277001	4	30	1	6	-
9	-	-	92780	9278001	4	30	1	6	-
9	v	1	92790	9279001	2	27	1	4	-
9	v	3	92800	9280001	4	30	1	9	-
9	z	1	92810	9281001	4	31	1	7	-
9	-	-	92820	9282001	3	27	1	5	-
9	-	-	92830	9283001	3	28	1	8	-
9	-	-	92840	9284001	3	23	1	7	-
9	-	-	92850	9285001	2	23	1	7	-
9	-	-	92860	9286001	3	23	1	7	-
9	-	-	92870	9287001	3	20	1	10	-
9	-	-	92880	9288001	2	22	1	5	-
9	-	-	92890	9289001	2	17	1	8	-
9	-	-	92900	9290001	2	20	1	7	-
9	-	-	92910	9291001	2	23	1	6	-
9	-	-	92920	9292001	1	19	1	7	-
9	-	-	92930	9293001	2	22	1	6	-
9	-	-	92940	9294001	1	16	1	7	-
10	jz	1	100010	10001001	23	70	3	8	6
10	v	1	100010	10001002	18	64	3	8	-
10	jz	1	100010	10001003	16	57	3	8	-
10	v	1	100010	10001004	5	38	3	8	-
10	-	0	100020	10002001	20	63	2	6	9
10	z	1	100020	10002002	14	51	2	6	-
10	j	1	100020	10002003	5	13	2	6	-
10	-	0	100040	10040001	16	42	1	12	-
10	-	0	100040	10004001	7	31	3	7	-
10	j	1	100050	10005001	3	25	1	5	-
10	j	1	100050	10005002	1	24	1	5	-
10	jz	1	100060	10006001	62	81	2	12	7
10	v	1	100070	10007001	170	111	3	16	-
10	-	2	100070	10007002	80	75	3	16	-
10	-	0	100080	10008001	4	34	3	4	-
10	-	0	100080	10008002	2	17	3	4	-
10	-	0	100080	10008003	1	22	3	4	-
10	jz	1	100100	10010001	21	59	2	8	-
10	z	1	100130	10013001	36	67	3	8	7
10	z	1	100130	10013002	36	81	3	8	7
10	z	1	100130	10013003	17	45	3	8	-
10	z	1	100130	10013004	17	43	3	8	-
10	z	1	100130	10013005	7	36	3	8	-
10	z	1	100130	10013006	4	31	3	8	-
10	z	1	100130	10013007	4	3	3	8	-
10	jz	1	100140	10014001	35	55	1	9	-
10	jz	1	100140	10014002	30	60	1	9	-
10	jz	1	100140	10014003	30	47	1	9	-
10	-	2	100140	10014004	10	47	1	9	-
10	jz	1	100150	10015001	15	43	2	8	-
10	jz	1	100160	10016005	21	39	1	10	-
10	jz	1	100160	10016003	17	45	1	10	-
10	z	1	100160	10016001	13	47	1	10	-
10	jz	1	100160	10016006	12	40	1	10	-
10	jz	1	100160	10016004	10	38	1	10	-
10	z	1	100160	10016002	10	38	1	10	-
10	-	0	100170	10017001	37	65	2	7	12
10	-	2	100180	10018003	110	76	3	12	-
10	jz	1	100180	10018001	50	70	3	12	-
10	-	2	100180	10018004	15	34	3	12	-
10	-	2	100180	10018005	10	29	3	12	-
10	jz	1	100180	10018002	6	27	1	12	-
10	jz	1	100190	10019002	106	82	1	21	-
9	-	1	100190	10019001	15	33	1	13	-
10	z	1	100200	10020001	49	66	1	13	-
10	z	1	100200	10020003	15	41	1	13	-
10	z	1	100200	10020002	5	27	1	13	-
10	z	1	100210	10021001	15	56	1	7	-
10	z	1	100210	10021002	6	34	1	7	-
10	z	1	100210	10021003	4	32	1	7	-
10	-	0	100220	10022002	15	46	1	8	-
10	-	-	100220	10022001	8	62	1	6	-
10	-	0	100220	10022003	5	38	1	7	-
10	jz	1	100240	10024001	22	56	1	8	-
10	jz	1	100250	10025001	9	43	2	6	-
10	-	0	100260	10026001	6	35	2	7	-
10	jz	1	100270	10027001	6	37	1	8	-
10	jz	1	100280	10028001	9	44	3	6	-
10	-	0	100290	10029001	1	18	2	5	-
10	j	1	100300	10030001	7	32	3	10	-
10	jz	1	100310	10031001	3	24	3	5	-
10	-	0	100310	10031002	2	32	2	5	-
10	jz	1	100320	10032001	22	53	2	9	-
10	v	1	100330	10033001	10	43	1	7	-
10	z	1	100340	10034001	47	75	3	9	7
10	-	2	100340	10034002	9	33	3	9	-
10	-	3	100340	10034003	8	38	3	9	-
10	z	1	100350	10035001	25	52	1	10	-
10	z	1	100350	10035002	15	60	1	10	-
10	j	1	100360	10036001	14	45	3	8	-
10	z	1	100370	10037001	100	95	2	11	-
10	z	1	100370	10037002	36	60	2	11	-
10	-	0	100380	10038001	7	31	1	10	-
10	-	1	100400	10041001	14	39	1	10	-
11	-	1	110010	11011008	17	62	2	9	-
11	-	1	110010	11011007	10	49	2	8	-
11	-	1	110010	11011009	7	46	2	9	-
11	-	-	110010	11011012	6	44	2	10	-
11	-	1	110010	11011011	5	39	2	9	-
11	-	-	110010	11011010	3	49	1	5	-
11	-	0	110010	11011019	2	25	1	8	-
11	-	1	110010	11011013	2	35	2	9	-
11	-	1	110010	11011014	2	30	1	8	-
11	-	1	110010	11011015	2	30	1	6	-
11	-	1	110010	11011016	2	30	1	5	-
11	-	1	110010	11011017	2	25	3	8	-
11	-	1	110010	11011018	2	27	1	5	-
11	-	1	110010	11011020	2	28	1	4	-
11	-	3	110020	11002001	57	79	3	9	-
11	-	1	110030	11003001	9	45	1	6	-
11	-	0	110030	11003002	7	39	1	6	-
11	-	1	110040	11004001	76	66	1	12	-
11	-	2	110040	11004004	27	48	2	14	-
11	-	1	110040	11004002	14	37	2	16	-
11	-	1	110040	11004003	14	35	2	16	-
11	-	1	110040	11004005	10	51	1	18	-
11	-	1	110040	11004006	6		1		-
11	-	1	110040	11004007	3		1		-
11	-	2	110060	11006002	63	90	2	10	-
11	-	-	110060	11006001	30	74	2	6	5
11	-	2	110060	11006003	26	77	2	8	-
11	-	2	110060	11006004	14	56	1	6	-
11	-	2	110060	11006005	10	44	2	6	-
11	-	2	110060	11006006	10	44	2	6	-
11	-	2	110060	11006007	9	37	1	6	-
11	-	2	110060	11006011	6	32	1	6	-
11	-	1	110060	11006008	5	34	1	6	-
11	-	1	110060	11006015	5	23	1	7	-
11	-	2	110060	11006009	5	35	2	6	-
11	-	2	110060	11006010	5	30	3	6	-
11	-	2	110060	11006012	5	24	1	7	-
11	-	1	110060	11006016	3	25	1	5	-
11	-	2	110060	11006013	3	22	2	7	-
11	-	2	110060	11006014	3	25	1	7	-
11	-	2	110070	11007001	15	45	1	8	-
11	-	1	110080	11008001	19	63	1	9	-
11	-	1	110090	11009001	37	73	1	10	-
11	-	1	110090	11009002	23	48	1	10	-
11	-	-	110090	11009003	16	61	1	10	-
11	-	2	110100	11011005	38	70	2	10	-
11	-	2	110100	11011006	10	45	2	8	-
11	-	1	110110	11011001	21	61	1	15	-
11	-	1	110110	11011002	7	50	2	10	-
11	-	1	110110	11011004	6		1		-
11	-	1	110110	11011003	5	47	1	12	-
11	-	1	110120	11012001	5	37	1	5	-
11	-	1	110120	11012002	3	25	1	5	-
11	-	-	110120	11012003	2	24	1	5	-
11	-	-	110120	11012004	1	21	1	5	-
11	-	1	110130	11013001	10	48	1	9	-
11	-	1	110140	11014001	6	33	1	7	-
11	-	-	110150	11015001	27	56	1	11	-
11	-	1	110160	11016001	20	51	1	10	-
11	-	0	110170	11017002	8	41	1	6	-
11	-	0	110170	11017001	4	26	1	6	-
11	-	1	110180	11018001	10	51	1	7	-
11	-	-	110200	11020001	7	36	2	7	-
11	-	0	110220	11022001	8	40	1	7	-
11	-	-	110230	11023001	33	60	2	11	-
11	-	0	110240	11024002	8	40	1	8	-
11	-	1	110240	11024001	8	36	1	9	-
11	-	1	110240	11024003	5	30	1	6	-
11	-	1	110250	11025001	99	85	1	16	-
11	-	3	110260	11026001	110	90	3	15	6
11	-	-	110270	11027002	31	54	2	13	-
11	-	3	110270	11027003	20	44	2	15	-
11	-	0	110270	11027004	19	44	2	12	-
11	-	-	110270	11027001	16	41	1	15	-
11	-	-	110270	11027008	10	31	1	11	-
11	-	1	110270	11027007	9	35	1	10	-
11	-	-	110270	11027009	9	27	1	13	-
11	-	1	110270	11027005	7	33	1	13	-
11	-	1	110270	11027010	7	33	1	10	-
11	-	1	110270	11027011	5	30	1	10	-
11	-	1	110270	11027012	4	26	1	8	-
11	-	-	110270	11027006	4	31	1	10	-
11	-	1	110300	11030001	3	29	1	6	-
11	-	1	110310	11031001	3	23	1	8	-
11	-	-	110320	11032001	1	22	1	4	-
11	-	-	110330	11033001	1	15	1	4	-
11	-	1	110340	11034001	4	22	1	8	-
11	-	-	110350	11035001	3	24	1	10	-
11	-	-	110360	11036001	4	27	2	7	-
11	-	-	110370	11037001	8	20	1	8	-
11	-	-	110380	11038001	5	27	1	14	-
12	-	-	120010	12001001	9	42	1	8	-
14	-	-	140010	14001001	6	50	1	5	-
14	-	-	140020	14002001	6	35	2	7	-
15	-	1	150010	15001001	7	40	2	6	-
15	-	1	150010	15001001	6	44	1	5	-
15	-	1	150010	15001002	3	27	1	5	-
15	-	1	150020	15002001	25	49	3	13	-
15	-	1	150020	15002002	20	43	3	13	-
15	-	1	150020	15002003	10	29	3	13	-
15	-	1	150020	15002004	10	33	3	13	-
15	-	1	150020	15002005	10	31	3	13	-
15	-	1	150020	15002006	10	34	3	13	-
15	-	1	150030	15003001	9	51	1	5	-
15	-	1	150040	15004001	4	29	1	7	-
15	-	1	150060	15006001	14	32	2		-
15	-	1	150070	15007001	25	67	1	9	6
15	-	1	150080	15008001	3	27	2	4	-
16	-	2	160010	16001001	6	43	2	4	-
16	-	1	160020	16002002	5	33	1	6	-
16	-	1	160020	16002001	4	46	1	3	-
16	-	1	160030	16003001	11	52	3	5	6
16	-	1	160030	16003002	10	57	2	6	-
16	-	3	160040	16004001	23	70	2	8	-
16	-	1	160050	16005001	20	76	1	6	6
16	-	3	160060	16006001	5	40	2	5	-
16	-	3	160070	16007001	8	47	2	5	-
16	-	1	160080	16008001	9	42	1	6	-
16	-	1	160090	16009001	37	67	2	14	-
16	a	-	160100	16010003	27	65	1	9	-
16	a	-	160100	16010001	4	26	1	8	-
16	a	-	160100	16010002	3	22	1	8	-
16	-	1	160110	16011001	25	82	2	7	9
16	-	3	160110	16011002	4	30	1	5	-
16	-	1	160120	16012001	16	48	1	9	-
16	-	1	160130	16013001	21	58	1	8	-
16	-	1	160140	16014001	46	71	2	15	-
16	-	1	160150	16015001	40	55	2	14	-
16	-	1	160150	16015002	40	57	2	14	-
16	-	2	160160	16016001	21	38	2	8	-
16	-	1	160170	16017001	22	51	2	7	-
16	-	-	160180	16018001	31	54	1	9	-
16	-	2	160190	16019001	31		2		-
16	-	1	160200	16020001	8	28	2	7	-
16	-	1	160210	16021001	22	50	1	9	-
16	-	2	160220	16022001	3	29	1	4	-
16	-	2	160240	16024001	3	33	2	4	-
16	a	-	160250	16025001	6	49	1	3	-
16	a	-	160250	16025003	4	41	1	3	-
16	a	-	160250	16025008	3	39	1	3	-
16	a	-	160250	16025009	3	35	1	3	-
16	a	-	160250	16025010	3	43	1	3	-
16	a	-	160250	16025002	2	38	1	3	-
16	a	-	160250	16025004	2	35	1	3	-
16	a	-	160250	16025005	2	27	1	3	-
16	a	-	160250	16025006	2	32	1	3	-
16	a	-	160250	16025007	2	33	1	3	-
16	a	-	160250	16025012	2	36	1	3	-
16	a	-	160250	16025011	1	21	1	3	-
16	a	-	160250	16025013	1	25	1	3	-
16	-	3	160260	16026001	16	74	3	5	-
16	-	1	160260	16026003	9	44	2	10	-
16	-	3	160260	16026002	7	44	3	5	-
16	-	3	160260	16026005	3	39	2	5	-
16	-	3	160260	16026006	3	26	2	5	-
16	-	1	160260	16026004	2	30	2	6	-
16	-	1	160270	16027002	7	50	2	5	-
16	-	1	160270	16027001	6	50	2	5	-
16	-	1	160290	16029001	5	36	2	4	-
16	-	1	160300	16030001	2	25	1	3	-
16	-	1	160320	16032001	3	25	1	5	-
16	-	1	160330	16033001	2	31	1	5	-
16	-	1	160340	16034001	13	65	1	9	-
16	-	1	160340	16034002	9	46	1	9	-
16	-	1	160340	16034003	9	37	1	13	-
16	-	1	160360	16036002	37	68	3	13	-
16	-	2	160360	16036001	37	64	3	13	-
16	-	2	160370	16037002	14	43	3	13	-
16	a	-	160370	16037001	14	45	2	10	-
16	-	1	160390	16039001	31	65	1	9	-
16	-	1	160400	16040001	28	76	2	9	-
16	-	1	160410	16041001	20	50	1	10	-
16	-	1	160420	16042001	5	26	3	12	-
16	-	1	160430	16043001	24	53	3	11	-
16	-	1	160430	16043002	17	51	3	9	-
16	-	1	160430	16043003	9	45	3	10	-
16	-	1	160430	16043004	5	25	3	9	-
16	-	3	160460	16046001	9	40	1	10	-
16	-	3	160460	16046002	9	36	1	10	-
16	-	2	160470	16047001	3	27	2	7	-
16	-	1	160490	16049001	6	45	1	6	-
16	a	-	160500	16050001	7	50	1	5	-
16	a	-	160510	16051001	2	29	1	4	-
16	-	1	160520	16052001	9	35	2	6	-
16	-	1	160520	16052002	9	30	2	6	-
16	-	2	160530	16053001	7	36	2	6	-
16	-	1	160540	16054001	5	30	2	8	-
16	-	1	160550	16055001	6	32	1	9	-
16	-	1	160560	16056001	16	42	1	13	-
16	-	1	160570	16057001	5	33	1	10	-
16	-	1	160580	16058001	9	36	1	7	-
16	-	2	160590	16059001	9	33	1	11	-
16	-	1	160600	16060001	9	35	1	13	-
16	-	2	160610	16061001	14	46	2	10	-
16	-	1	160620	16062001	12	46	1	10	-
16	-	1	160630	16063001	8	37	1	12	-
16	-	1	160640	16064001	5	43	2	4	-
16	-	1	160650	16065001	4	33	2	6	-
16	-	1	160660	16066001	5	25	2	10	-
16	-	1	160670	16067001	10	34	2	10	-
16	-	1	160680	16068001	2	24	1	7	-
16	-	1	160690	16069001	46	35	1	6	-
16	-	1	160700	16070001	3	30	1	7	-
16	a	-	160710	16071001	4	40	1	5	-
16	a	-	160710	16071002	2	30	2	5	-
16	a	-	160730	16073003	10	41	2	7	-
16	-	1	160730	16073001	9	45	2	7	-
16	-	1	160730	16073002	8	39	2	7	-
16	a	-	160740	16074001	5	35	1	4	-
16	a	-	160750	16075001	5	30	3	6	-
16	-	1	160760	16076001	47	31	1	6	-
16	-	1	160770	16077001	10	53	3	8	-
16	-	2	160770	16077002	5	34	2	4	-
16	-	1	160780	16078004	13	53	1	5	-
16	-	1	160780	16078010	11	42	3	7	-
16	-	1	160780	16078005	9	41	2	7	-
16	-	1	160780	16078007	7	30	2	8	-
16	-	2	160780	16078001	7	43	2	7	-
16	a	-	160780	16078002	6	40	1	5	-
16	-	1	160780	16078006	5	35	1	5	-
16	a	-	160780	16078003	5	43	1	4	-
16	-	2	160780	16078008	4	30	2	6	-
16	-	1	160780	16078009	3	27	1	6	-
16	a	-	160790	16079001	3	38	1	5	-
16	-	1	160800	16080001	2	28	1	4	-
16	-	1	160810	16081001	7	51	1	5	-
16	-	1	160810	16081004	5	38	1	4	-
16	-	1	160810	16081002	3	25	1	5	-
16	-	1	160810	16081003	3	28	1	4	-
16	-	1	160840	16084001	5	38	1	6	-
16	-	3	160850	16085001	10	40	1	10	-
16	-	1	160860	16086001	5	34	1	6	-
16	-	1	160890	16089001	2	20	2	6	-
16	-	3	160910	16091001	10	41	2	6	-
16	-	1	160920	16092001	7	37	1	7	-
16	-	1	160930	16093001	3	36	1	4	-
16	-	3	160940	16094001	10	53	3	5	-
16	-	1	160940	16094002	3	40	2	3	-
16	-	2	160950	16095001	7	38	3	5	-
16	-	1	160960	16096001	4	28	1	5	-
16	a	-	160960	16096002	3	30	1	6	-
16	-	1	160970	16097001	3	28	1	6	-
16	-	1	160980	16098001	2	29	1	5	-
16	-	2	160990	16099001	2	32	1	4	-
16	-	2	161000	16100001	5	32	2	7	-
16	-	2	161010	16101001	3	25	1	7	-
16	-	2	161020	16102001	6	42	1	4	-
16	-	1	161040	16104001	2	28	1	3	-
16	-	1	161050	16105001	2	28	1	3	-
16	-	1	161060	16106001	2	23	1	4	-
16	-	1	161060	16106002	1	25	1	3	-
16	-	3	161070	16107001	2	27	1	5	-
16	-	3	161080	16108001	3	37	2	5	-
16	-	2	161090	16109001	2	27	1	6	-
16	-	1	161100	16110001	3	28	1	4	-
16	-	1	161110	16111001	3	23	1	6	-
16	-	1	161120	16112001	2	27	1	5	-
16	-	1	161130	16113001	3	27	1	6	-
16	-	1	161140	16114001	3	33	1	6	-
18	-	-	180010	18001001	7	40	2	5	-
18	-	-	180020	18002001	8	45	2	5	-
18	-	-	180020	18002002	4	29	2	5	-
18	-	-	180020	18002003	4	38	2	5	-
18	-	-	180020	18002004	4	30	2	5	-
18	-	-	180020	18002005	4	30	2	5	-
18	-	-	180030	18003001	8	33	1	9	-
21	-	-	210010	21001001	80	75	1	17	-
21	-	-	210020	21002001	2	27	1	5	-
22	-	1	220010	22001001	14	50	2	8	-
22	-	1	220020	22002001	7	38	2	5	-
22	-	2	220030	22003001	3	29	3	5	-
22	-	1	220040	22004001	3	29	2	5	-
22	-	1	220050	22005001	3	25	1	4	-
22	-	1	220060	22006001	21	58	1	8	-
22	-	1	220070	22007001	10	35	1	9	-
22	-	0	220080	22008001	4	25	1	7	-
22	-	1	220090	22009002	100	90	2	11	5
22	-	1	220090	22009001	90	80	2	16	-
22	-	1	220090	22009004	52	68	1	11	-
22	-	1	220090	22009003	44	68	2	13	-
22	-	1	220090	22009006	39	59	2	13	-
22	-	1	220090	22009005	33	60	1	12	-
22	-	1	220090	22009019	33		1		-
22	-	3	220090	22009024	29	24	1	6	-
22	-	1	220090	22009011	20	65	1	8	-
22	-	1	220090	22009014	15	37	1	13	-
22	-	1	220090	22009007	14	35	2	15	-
22	-	1	220090	22009009	14	45	1	12	-
22	-	1	220090	22009013	14	38	1	15	-
22	-	1	220090	22009016	13	36	3	13	-
22	-	1	220090	22009012	12	43	1	9	-
22	-	1	220090	22009017	9	33	2	11	-
22	-	1	220090	22009008	8	25	1	14	-
22	-	1	220090	22009010	8	30	1	12	-
22	-	1	220090	22009018	8	36	2	10	-
22	-	1	220090	22009015	7	31	2	10	-
22	-	1	220090	22009020	7	33	1	10	-
22	-	1	220090	22009021	6	36	2	11	-
22	-	1	220090	22009023	6	29	1	12	-
22	-	1	220090	22009022	5	29	1	10	-
22	-	1	220110	22011001	8	42	1	7	-
22	-	1	220110	22011002	8	45	1	6	-
22	-	0	220110	22011005	7	38	1	6	-
22	-	1	220110	22011004	7	40	1	6	-
22	-	1	220110	22011006	4	32	1	6	-
22	-	-	220110	22011003	4	25	2	6	-
22	-	1	220110	22011007	3	28	2	5	-
22	-	-	220110	22011008	2	22	1	6	-
22	-	-	220110	22011009	1	23	2	4	-
22	-	-	220110	22011010	1	17	1	6	-
22	-	1	220120	22012001	52	66	3	12	-
22	-	1	220130	22013001	68	90	3	12	-
22	-	1	220130	22013002	29	63	3	9	-
22	-	1	220130	22013003	6	30	3	9	-
22	-	1	220150	22015001	22	46	3	15	-
22	-	2	220160	22016001	15	46	3	10	-
22	-	2	220160	22016002	5	37	3	9	-
22	-	1	220180	22018001	8	32	1	8	-
22	-	2	220190	22019001	10	39	2	9	-
22	-	2	220190	22019002	8	33	2	10	-
22	-	1	220200	22020001	5	35	2	5	-
22	-	1	220220	22022001	6	34	2	6	-
22	-	1	220230	22023001	7	33	2	9	-
22	-	2	220300	22030001	3	28	2	5	-
22	-	-	220300	22030002	2	19	1	5	-
22	-	0	220310	22031001	3	27	2	6	-
22	-	-	220310	22031002	1	14	1	6	-
22	-	1	220320	22032001	3	30	2	4	-
22	-	-	220320	22032002	2	29	2	4	-
22	-	-	220320	22032003	1	18	2	4	-
22	-	-	220320	22032004	1	20	2	4	-
22	-	1	220330	22033001	3	33	2	3	-
22	-	1	220330	22033002	3	32	2	5	-
22	-	-	220330	22033003	1	23	1	4	-
22	-	-	220340	22034001	1	19	1	6	-
22	-	-	220350	22035001	1	19	1	4	-
22	-	-	220360	22036001	1	20	1	3	-
22	-	-	220370	22037001	1	22	1	4	-
22	-	-	220380	22038001	1	18	1	4	-
22	-	-	220390	22039001	2	25	1	5	-
22	-	-	220400	22040001	2	20	1	6	-
22	-	-	220410	22041001	1	19	1	5	-
22	-	-	220420	22042001	1	16	1	4	-
22	-	-	220430	22043001	1	15	1	6	-
22	-	-	220440	22044001	9	15	1	4	-
24	-	1	240010	24001001	41	80	3	9	-
24	-	1	240020	24002001	46	67	1	11	-
25	-	1	250010	25001001	12	34	1	12	-
25	-	1	250020	25002001	2	18	1	9	-
26	-	1	260010	26001002	7	31	1	9	-
26	-	1	260010	26001001	3	26	1	9	-
26	-	1	260020	26002001	7	39	1	9	-
26	-	1	260030	26003001	2	22	1	7	-
26	-	1	260030	26003002	2	19	1	7	-
26	-	1	260030	26003003	2	16	1	7	-
30	-	1	300010	30001001	19	61	2	7	-
30	-	1	300010	30001005	16	56	1	7	5
30	-	1	300010	30001002	16	60	1	7	-
30	-	1	300010	30001003	6	39	1	7	-
30	-	2	300010	30001004	6	45	1	7	-
30	-	1	300020	30002001	33	78	3	7	7
30	-	2	300030	30003001	14	58	2	7	-
30	-	2	300030	30003002	9	45	2	7	-
30	-	-	300040	30004002	7	31	2	6	-
30	-	1	300040	30004001	2	24	1	5	-
30	-	-	300050	30005005	37	66	2	7	-
30	-	-	300050	30005003	13	53	2	8	-
30	-	-	300050	30005002	12	46	2	10	-
30	-	-	300050	30005004	12	51	2	8	-
30	-	2	300050	30005001	2	26	2	5	-
30	-	-	300060	30006003	42	65	1	12	-
30	-	1	300060	30006001	16	52	1	10	-
30	-	1	300060	30006002	12	44	1	10	-
30	-	1	300070	30007002	9	41	1	8	-
30	-	1	300070	30007001	7	38	1	7	-
30	-	1	300080	30008004	59	55	3	11	-
30	-	1	300080	30008006	34	60	2	12	-
30	-	-	300080	30008005	24	53	3	10	-
30	-	2	300080	30008001	16	43	3	14	-
30	-	2	300080	30008002	16	41	3	14	-
30	-	2	300080	30008003	14	40	3	14	-
30	-	1	300080	30008007	10	34	3	11	-
30	-	1	300090	30009002	252	136	1	17	-
30	-	1	300090	30009001	184	113	1	16	-
30	-	1	300090	30009003	56	72	1	16	-
30	-	1	300090	30009004	12	40	2	5	-
30	-	1	300090	30009005	12	50	2	5	-
30	-	2	300100	30010001	48		1		-
30	-	1	300110	30011001	166	109	1	14	-
30	-	2	300120	30012001	77	94	2	13	-
30	-	2	300120	30012002	70	76	2	13	-
30	-	2	300120	30012003	23	57	2	13	-
30	-	1	300120	30012005	10	43	1	6	-
30	-	2	300120	30012004	9	42	2	13	-
30	-	-	300120	30012007	9	36	1	13	-
30	-	-	300120	30012008	7	46	1	8	-
30	-	-	300120	30012009	7	48	1	6	-
30	-	1	300120	30012006	5	40	1	6	-
30	-	1	300130	30013001	77	81	2	15	-
30	-	1	300130	30013002	56	70	2	15	-
30	-	1	300130	30013003	5	40	1	5	-
30	-	2	300140	30014002	35	60	2	14	-
30	-	1	300140	30014001	7	36	1	7	-
30	-	1	300150	30015001	35	62	1	9	-
30	-	1	300150	30015002	30	63	3	10	-
30	-	1	300160	30016001	36	70	2	10	-
30	-	1	300160	30016002	18	62	2	11	-
30	-	2	300160	30016003	12	37	2	11	-
30	-	1	300170	30017001	26	60	2	11	-
30	-	1	300170	30017002	6	27	2	11	-
30	-	1	300180	30018006	37	61	3	14	-
30	-	1	300180	30018005	24	60	3	12	-
30	-	1	300180	30018007	14	40	3	10	-
30	-	1	300180	30018003	13	36	3	11	-
30	-	-	300180	30018004	13	49	3	11	-
30	-	1	300180	30018001	10	43	1	9	-
30	-	1	300180	30018002	8	34	1	9	-
30	-	1	300190	30019002	14	41	1	11	-
30	-	-	300190	30019001	12	39	3	10	-
30	-	-	300200	30020001	13	40	3	9	-
30	-	1	300200	30020002	6	27	2	11	-
30	-	1	300210	30021002	14	42	2	10	-
30	-	1	300210	30021001	5	27	2	11	-
30	-	1	300220	30022001	15	40	1	13	-
30	-	1	300230	30023002	14	37	1	13	-
30	-	1	300230	30023001	6	25	1	8	-
30	-	1	300240	30024003	22	77	2	7	6
30	-	1	300240	30024002	8	44	2	7	-
30	-	-	300240	30024001	6	34	3	7	-
30	-	1	300250	30025001	9	32	1	10	-
30	-	1	300250	30025002	7	34	1	6	-
30	-	1	300250	30025007	5	43	1	6	-
30	-	1	300250	30025004	3	34	1	5	-
30	-	1	300250	30025003	2	29	1	4	-
30	-	1	300250	30025005	2	23	1	4	-
30	-	1	300250	30025006	2	27	1	4	-
30	-	1	300260	30026001	12	48	2	8	-
32	-	1	320180	32018001	5	30	1	8	-
32	-	-	320210	32021001	6	26	1	11	-
32	-	1	320220	32022001	6	22	1	11	-
32	-	1	320260	32026001	26	71	2	5	6
32	-	1	320260	32026005	3	29	1	5	-
32	a	-	320260	32026004	3	27	1	5	-
32	-	1	320260	32026002	2	22	2	4	-
32	-	1	320260	32026003	2	22	2	4	-
32	-	1	320270	32027001	14	55	2	6	-
32	-	1	320280	32028001	26	71	1	8	6
32	-	-	320280	32028004	23	55	2	10	-
32	a	-	320280	32028003	14	47	2	7	-
32	-	1	320280	32028002	12	40	1	8	-
32	-	1	320300	32030001	10	39	3	10	-
32	-	1	320310	32031001	6	41	3	7	-
32	-	1	320310	32031002	6	40	3	7	-
32	-	-	320310	32031003	6	36	1	8	-
32	-	2	320320	32032001	9	50	2	6	-
32	-	2	320320	32032002	9	53	2	6	-
32	-	1	320340	32034001	5	32	1	7	-
32	-	-	320340	32034002	5	32	1	6	-
32	-	1	320360	32036001	3	26	1	7	-
32	-	1	320380	32038001	6	36	1	5	-
32	-	1	320380	32038002	3	30	1	5	-
32	-	-	320390	32039001	5	27	1	8	-
32	-	1	320420	32042001	3	21	1	6	-
32	-	1	320430	32043001	3	25	1	7	-
32	-	1	320440	32044001	2	29	1	4	-
32	-	1	320450	32045001	2	24	3	5	-
32	-	1	320460	32046001	3	30	1	5	-
32	-	1	320480	32048001	2	30	1	7	-
32	-	1	320520	32052002	6	33	1	6	-
32	-	-	320520	32052001	6	36	2	4	-
32	-	1	320520	32052005	5	34	1	5	-
32	-	1	320520	32052003	3	42	2	4	-
32	-	1	320520	32052004	3	33	1	4	-
32	a	-	320540	32054001	2	28	1	4	-
32	-	1	320550	32055002	3	28	1	5	-
32	-	1	320550	32055003	3	33	1	4	-
32	-	1	320550	32055004	3	34	1	4	-
32	a	-	320550	32055001	2	25	1	4	-
32	-	1	320570	32057001	6	32	1	5	-
32	-	1	320570	32057002	2	24	1	5	-
32	-	1	320590	32059004	5	32	1	5	-
32	-	2	320590	32059001	5	32	1	4	-
32	a	-	320590	32059002	3	31	1	4	-
32	a	-	320590	32059003	3	34	1	4	-
32	a	-	320590	32059005	2	30	2	4	-
32	-	1	320620	32062001	5	43	1	5	-
32	-	2	320620	32062002	5	36	1	5	-
32	-	-	320630	32063001	6	36	1	7	-
32	-	-	320630	32063002	3	27	1	8	-

## Sheet: Database_notes
	Codes and shortcuts are based on previously used descriptive systems
	LOPOIII, LO_emic	(Květina & Pavlů, 2007, pp 72-73)
	Technical decoration	(Květina & Pavlů, 2007, p 60)
	Knobs, Handles	(Květina & Pavlů, 2007, pp 58-59)
	Vessels_table
	Feature	Pit/feature number
	ID_vessel	Unique ID of vessel
	N_shreds	Number of fragments of each vessel
	Fine_Coarse	Pottery material class - fine/coarse ware
	Decor_type	Type of decoration:
		LO - linear decoration
		TO - technical decoration
		NO - withouth decoration
	Knob	Type of knob
	Handle	Type of handle
	Technical decoration	Technical decoraiton code
	LOPOIII	Linear decoration element code
	LO_emic	Linear decoration style code
	edge_type	Type of vessel edge
	line_widht	Width of oengraved line (in 0,1mm)
	line_profile	Cross section of engraved lines (V/U shaped)
	rim_diameter	Reconstructable diameter of vessel
	Fragments_table
	Feature	Pit/feature number
	Part	Part of feature
	Level	Level of feature
	ID_vessel	ID of vessel
	ID_frag	Unique ID of fragment
	WEIGHT	Weight of fragment (g)
	SIZE	Size of fragment (mm)
	ABRAZE	Abrasion of fragment
		1 - heavily abraded fragments
		2 - moderately abraded fragments
		3 - lightly abraded fragments
	WALL	Thickness of fragment wall (mm)
	HEIGHT	Curvature of fragments (in mm; for sherds with more than 5 mm of curvature)
