# Supplementary material for: Waste Around Longhouses: Taphonomy on LBK Settlement in Hlízov
Source: publisher site journal article supplement (doi:10.1515/opar-2024-0032), 2025-01-01
Supplement: Supplementary file 2 [file SUPL3_pottery_fragmentation.xlsx]

## Sheet: 1_Fragmentation
	The assumption of normal data distribution was not met. However, the datasets are large enough to run an ANOVA.
	Tests of Normality
		Feature		Kolmogorov-Smirnova			Shapiro-Wilk
				Statistic	df	Sig.	Statistic	df	Sig.
	LFI		9	0.087	493	0	0.933	493	0
			10	0.104	73	0.048	0.979	73	0.276
			11	0.111	88	0.01	0.919	88	0
			16	0.084	150	0.011	0.947	150	0
			22	0.151	76	0	0.899	76	0
			30	0.099	81	0.05	0.918	81	0
			32	0.17	52	0.001	0.899	52	0
	ANOVA
	LFI
		Sum of Squares	df	Mean Square	F	Sig.
	Between Groups	2.631	6	0.438	4.715	0
	Within Groups	93.545	1006	0.093
	Total	96.176	1012
	LFI
	Tukey B
	Feature		N	Subset for alpha = 0.05
				1	2	3
		22	76	0.682732
		32	52	0.7463	0.7463
		11	88	0.769422	0.769422
		9	493		0.823464	0.823464
		16	150		0.825665	0.825665
		10	73		0.865418	0.865418
		30	81			0.903601
	Statistically significant differences were found between the LFI values of individual features.
