# Supplementary material for: Waste Around Longhouses: Taphonomy on LBK Settlement in Hlízov
Source: publisher site journal article supplement (doi:10.1515/opar-2024-0032), 2025-01-01
Supplement: Supplementary file 3 [file SUPL7_lithics_database.xlsx]

## Sheet: Feuil1
N°	Site	ID	feature	nb	weight	raw material	fragmentation	blank	production	cortex	lenght	width	thickness	tool	typology
1	Hlízov	3	surface	1	24.4	skršín	mesial	flake	reused blade/let	0	38.2	34.1	15.7	1	denticulated
2	Hlízov	3	21	1	1.228	Cracow	entire	flake	blade/let	25	21.7	16.3	3.7	0
3	Hlízov	4	21	1	0.725	skršín	entire	flake	indeterminate	0	19	9.5	3.8	0
4	Hlízov	5	21	1	0.9	skršín	entire	blade	blade/let	0	29.5	9.8	2.7	0
5	Hlízov	10	3	1	57.9	Cracow	mesial lateral	flake	blade/let	25	65.4	37.3	28.9	0
6	Hlízov	22	23	1	1.37	skršín	mesial lateral	blade	blade/let	<25	25	17.1	4.1	1	arrowhead
7	Hlízov	23	23	1	0.952	skršín	distal	blade	blade/let	25	16.4	15.8	3.4	0
8	Hlízov	24	22	1	9.8	SGS	mesio-distal	flake	blade/let	25	30	21.8	14.4	0
9	Hlízov	68	32	1	7.8	SGS	mesio-distal	elongated flake	blade/let	35	38.4	27.9	8.7	1	retouched
10	Hlízov	69	32	1	25.7	skršín	entire	flake	reused blade/let	0	37.4	52.1	15.6	0
11	Hlízov	70	32	1	29	skršín	entire	flake	reused blade/let	25	48.9	39.8	14.5	1	retouched
12	Hlízov	71	32	1	10	skršín	entire	flake	reused blade/let	25	34.7	25.4	9.4	1	retouched
13	Hlízov	72	32	1	16.4	SGS	NR	debris	blade/let	50	39.8	25.5	16.3	0
14	Hlízov	73	32	1	2	skršín	mesio-proximal	blade	blade/let	0	34.4	12.2	2.3	1?	used
15	Hlízov	74	32	1	3.8	skršín	mesio-distal	flake	reused blade/let	0	22.4	30.6	6.5	0
16	Hlízov	75	32	1	2.7	SGS	entire	flake	blade/let	0	29.4	19.7	1.7	1?	used
17	Hlízov	76	32	1	5.207	skršín	mesio-distal	blade	blade/let	25?	22.4	16.9	6.1	0
18	Hlízov	77	32	1	1.8	skršín	entire	blade	blade/let	0?	35	11.5	3.9	1	used
19	Hlízov	78	32	1	4.559	skršín	mesio-distal	blade	blade/let	0	32.6	18.4	4.9	1?	used
20	Hlízov	79	32	1	1.5	skršín	entire	blade	blade/let	0	33.2	10.5	3.1	0
21	Hlízov	80	32	1	1.6	SGS	mesio-proximal	blade	blade/let	25	23	12.6	4.3	1	scraper
22	Hlízov	81	32	1	1.09	skršín	entire	flake	blade/let	0	18.6	20.5	2.6	1	used
23	Hlízov	82	32	1	0.689	skršín	entire	flake	blade/let	0	24.3	9.8	2.9	0
24	Hlízov	83	32	1	1.148	skršín	distal	blade	blade/let	0	24.6	10.3	5.4	0
25	Hlízov	84	32	1	1.8	Cracow	mesio-proximal	blade	blade/let	0	24.6	15.5	5.2	1	fragment
26	Hlízov	85	32	1	2.652	skršín	entire	flake	blade/let	0	16.1	24.9	7	0
27	Hlízov	86	32	1	1.952	skršín	entire	flake	indeterminate	50	19.9	21.1	5.9	0
28	Hlízov	87	32	1	0.392	skršín	entire	flake	blade/let	0	17.8	10.5	2.3	0
29	Hlízov	88	32	1	1.081	skršín	entire	flake	blade/let		18	18.9	3.7	1	retouched
30	Hlízov	89	32	1	0.254	skršín	entire	small flake	indeterminate	25	11.6	10.8	1.9	0
31	Hlízov	90	32	1	0.269	skršín	mesial lateral	blade	blade/let	0	10.6	15.1	1.7	0
32	Hlízov	91	32	1	0.387	skršín	distal	chip	indeterminate		6.8	17.8	2.6	0
33	Hlízov	92	32	1	0.356	skršín	mesial	flake	blade/let		6.7	21	1.7	0
34	Hlízov	93	32	1	0.519	skršín	entire	flake	blade/let	25	19	16	1.2	0
35	Hlízov	94	32	1	0.608	skršín	entire	flake	blade/let	75	15	18.8	1.3	0
36	Hlízov	95	32	1	0.64	skršín	mesial	elongated flake	blade/let	INDET	13.2	10.3	4.1	0
37	Hlízov	96	32	1	0.37	skršín	proximal lateral	flake	blade/let		10.8	10.8	2	0
38	Hlízov	97	32	1	0.314	skršín	entire	small flake	blade/let		9.2	14.6	2.1	0
39	Hlízov	98	32	1	0.722	skršín	distal	flake	blade/let	25	14.8	20.7	4.5	0
40	Hlízov	99	32	1	1.438	skršín	indeterminate	debris	indeterminate		23.1	16.2	5.8	0
41	Hlízov	100	32	1	0.8	Cracow	entire	flake	reused blade/let	0	12.3	14.4	4.4	waste	hammerstone spall
42	Hlízov	101	32	1	0.257	skršín	entire	small flake	blade/let		13.9	7.6	1.5	0
43	Hlízov	102	32	1	0.51	skršín	entire	small flake	indeterminate		14.4	16	3.8	0
44	Hlízov	103	32	1	0.637	Cracow	entire	bladelet	blade/let	0	31.4	5.7	2.8	1	retouched
45	Hlízov	104	32	1	0.304	skršín	entire	small flake	blade/let		12.6	8.6	2.3	0
46	Hlízov	105	32	1	0.519	Cracow	entire	bladelet	blade/let	0	24.8	7.5	2.5	0
47	Hlízov	106	32	1	1.485	skršín	entire	flake	blade/let		17	21.1	2	0
48	Hlízov	107	32	1	1.3	skršín	mesio-proximal	blade	blade/let	25	25.2	9	4.3	0
49	Hlízov	108	32	1	0.149	skršín	distal	chip	indeterminate		5.4	15.9	1.6	0
50	Hlízov	109	32	1	0.34	INDET	mesial	bladelet	blade/let	25	8.1	9.3	3.5	0
51	Hlízov	110	32	1	0.172	skršín	entire	chip	indeterminate		7.6	13.7	1.2	0
52	Hlízov	111	32	1	0.29	skršín	distal	blade	blade/let	0	9.3	11.6	2.8	0
53	Hlízov	112	32	1	2	Cracow	mesio-proximal	blade	blade/let	25?	25.7	13.6	4.7	1	used
54	Hlízov	113	32	1	0.376	Cracow	entire	flake	blade/let	0	10.8	20.2	2	0
55	Hlízov	114	32	1	0.872	skršín	entire	flake	reused blade/let	0	15.9	15.7	2.8	0
56	Hlízov	115	32	27	1.486	skršín	indeterminate	small flake	indeterminate					0
57	Hlízov	115	32	2	0.231	skršín	entire	small flake	blade/let					0
58	Hlízov	115	32	1	0.343	skršín	proximal	small flake	blade/let					0
59	Hlízov	115	32	4	0.445	skršín	entire	small flake	blade/let					0
60	Hlízov	115	32	1	0.437	skršín	entire	small flake	indeterminate					0
61	Hlízov	115	32	2	0.31	skršín	entire	small flake	blade/let					0
62	Hlízov	115	32	4	0.462	skršín	entire	small flake	indeterminate					0
63	Hlízov	115	32	5	0.418	skršín	entire	small flake	indeterminate					0
64	Hlízov	115	32	2	0.107	skršín	mesial	bladelet	blade/let					0
65	Hlízov	115	32	2	0.372	skršín	entire	small flake	blade/let	75				0
66	Hlízov	115	32	1	0.101	skršín	distal	bladelet	blade/let					0
67	Hlízov	115	32	1	0.316	skršín	mesial	elongated flake	blade/let					0
68	Hlízov	115	32	1	0.085	SGS	entire	small flake	indeterminate					0
69	Hlízov	115	32	1	0.053	Cracow	entire	small flake	blade/let		3.6	6.9	1	0
70	Hlízov	115	32	1	0.055	Cracow	mesial lateral	indeterminate	blade/let	50				0
71	Hlízov	115	32	1	0.197	INDET	mesial lateral	indeterminate	indeterminate					0
72	Hlízov	115	32	1	0.127	Cracow	entire	small flake	blade/let		13.2	9.5	1.1	0
73	Hlízov	115	32	1	0.051	Cracow	entire	small flake	blade/let		7	8.9	0.4	0
74	Hlízov	115	32	1	0.057	Cracow	entire	small flake	blade/let		4.5	6.3	1.9	0
75	Hlízov	115	32	1	0.018	Cracow	distal	small flake	indeterminate	75				0
76	Hlízov	116	16	1	0.802	INDET	entire	flake KW?	blade/let		17.5	22.1	1.9	0
77	Hlízov	116	32	1	0.832	skršín	entire	flake KW	indeterminate		17.5	16.2	2.5	0
78	Hlízov	116	32	1	0.108	skršín	entire	chip	indeterminate		10.9	7	1.2	0
79	Hlízov	116	32	1	0.06	skršín	indeterminate	small flake	indeterminate					0
80	Hlízov	116	32	2	0.546	skršín	indeterminate	small flake	blade/let					0
81	Hlízov	117	16	1	3.1	SGS	entire	spall	other	0	21.4	30.9	5	waste
82	Hlízov	117	32	1	0.174	skršín	distal lateral	indeterminate	blade/let		9.3	9.6	1.7	0
83	Hlízov	117	32	1	0.281	SGS	indeterminate	indeterminate	indeterminate		9.2	11.3	1.2	1	fragment
84	Hlízov	118	16	1	0.089	Cracow	mesial	bladelet	blade/let		6.1	5.8	2	0
85	Hlízov	118	32	1	0.119	skršín	lateral	small flake	indeterminate					0
86	Hlízov	118	16	1	0.165	INDET/BURNT	mesial	flake	blade/let		7.9	8.9	2.4	0
87	Hlízov	118	16	1	0.843	INDET/BURNT	mesial	blade	blade/let	50	14.7	12.9	4	0
88	Hlízov	118	16	1	0.075	skršín	entire	small flake	blade/let		7.7	0.6	0	0
89	Hlízov	119	32	1	0.039	skršín	entire	small flake	blade/let		4.2	4.6	2.2	0
90	Hlízov	119	32	1	0.143	skršín	NR	chip	indeterminate					0
91	Hlízov	120	32	1	0.236	skršín	distal	indeterminate	blade/let	0	10	7.3	2.5	0
92	Hlízov	120	32	1	0.626	skršín	entire	blade	blade/let	0	9.5	15.7	4.6	0
93	Hlízov	120	32	1	1.02	skršín	entire	flake	blade/let	?	17.6	20.8	2.7	0
94	Hlízov	182	surface	1	8.7	Cracow	mesial lateral	flake	simple?	0	22.2	24	15.4	1	with splintered negatives
95	Hlízov	183	9	1	7.7	skršín	entire	flake	blade/let	0	43.9	41.9	10.4	0
96	Hlízov	184	9	1	3.3	Cracow	entire	flake	blade/let	0	26.3	23.3	4.3	1	retouched
97	Hlízov	185	9	1	0.796	skršín	entire	flake	indeterminate	25	12.6	23.8	4.1	0
98	Hlízov	186	9	1	1.5	SGS	mesial	blade	blade/let	0	24.5	15.3	3.4	1	sickle
99	Hlízov	187	9	1	1.47	Cracow	mesio-proximal	blade	blade/let	25	28.9	9.6	4.7	0
100	Hlízov	188	9	1	0.284	SGS	entire	bladelet	blade/let	0	19.3	6.6	1.3	0
101	Hlízov	189	9	1	0.248	SGS	proximal	blade	blade/let	0	7.8	11.5	1.7	0
102	Hlízov	190	9	1	0.7	INDET	entire	blade	blade/let	0	30	15.1	1.1	0
